# Supplementary material for: Structural basis for ion selectivity in TMEM175 K+ channels
Source: eLife. 2020 Apr 8;9:e53683. doi: 10.7554/eLife.53683 (PMC7176437; doi:10.7554/eLife.53683)
Supplement: Figure 1—figure supplement 4—source data 1. [file elife-53683-fig1-figsupp4-data1.xlsx]

## Sheet: Tabelle1
		Native	6HD8		Cs+	6HDA		Rb+	6HD9		Zn2+	6HDB		K+/S			T38A_Native	6HDC		T38A_Zn	6SWR
	𝜆	0.87933			2.0069			0.7948			1.2461			2.0246			1.00004			1.28096
		Resolution [Å]	I/σI (Native)		Resolution [Å]	I/σI (Cäsium)		Resolution [Å]	I/σI (Rubidium)		Resolution [Å]	I/σI (Zinc)		Resolution [Å]	I/σI (Sulfur)		Resolution [Å]	I/σI (T38A_native)		Resolution [Å]	I/σI (T38A)
		10.74	169.99		20	57.03		20	52.71		20	71.14		15.66	61.92		20	61.79		20	47.62
		7.59	139.21		10	48.75		15	51.24		15	69.36		11.07	58.26		15	64.19		15	49.23
		6.2	97.58		9	36.55		10	44.44		10	67.93		9.04	55.39		10	53.36		10	45.71
		5.37	73.11		8	29.58		9	38.7		8	49.72		7.83	42.88		8	42.96		9	38.22
		4.8	70.22		7	21.17		8	33.88		6	28.27		7	32.77		7	29.93		8	34.79
		4.38	59.26		6	13.69		7	24.35		5	18.97		6.39	27.5		6	20.47		7	26.92
		4.06	41.97		5	8.32		6	18.03		3.94	12.96		5.92	23.14		5	12.81		6	16.07
		3.8	28.38		4	4.04		5	12.85		3.8	6.86		5.54	19.39		4.6	11.37		5	11.31
		3.58	21.31		3.9	1.36		4	8.89		3.65	5.55		5.22	19.19		4.2	8.57		4	7.01
		3.4	13.96		3.8	0.94		3.9	3.86		3.5	3.84		4.95	17.68		4	4.97		3.8	2.99
		3.24	10.03					3.75	3.21		3.35	2.74		4.72	17.19		3.9	3.84		3.6	2.22
		3.1	6.99					3.62	2.42		3.2	1.74		4.52	16.28		3.8	2.89		3.5	1.3
		2.98	5.44					3.5	1.44		3.04	1.1		4.34	12.6		3.67	2.61		3.4	0.99
		2.87	4.25								2.9	0.6		4.19	9.17		3.49	1.78		3.3	0.72
		2.77	3.72											4.04	7.01		3.4	1.08		3.2	0.5
		2.68	3.27											3.92	5.4
		2.6	2.5											3.8	4.21
		2.53	2.19											3.69	3.73
		2.46	1.88											3.59	2.69
		2.4	1.52											3.5	1.99
