# Supplementary material for: Structural basis for ion selectivity in TMEM175 K+ channels
Source: eLife. 2020 Apr 8;9:e53683. doi: 10.7554/eLife.53683 (PMC7176437; doi:10.7554/eLife.53683)
Supplement: Figure 2—figure supplement 1—source data 1. [file elife-53683-fig2-figsupp1-data1.xlsx]

## Sheet: Blatt1
Figure 2–figure supplement 1a
voltage	mean I/ r.u.	SD
-100	-0.25	0.09
-80	-0.19	0.08
-60	-0.11	0.06
-40	-0.06	0.05
-20	-0.045	0.05
0	0.045	0.04
20	0.29	0.08
40	0.47	0.14
60	0.64	0.12
80	0.84	0.8
100	1	0
