# Supplementary material for: Structural basis for ion selectivity in TMEM175 K+ channels
Source: eLife. 2020 Apr 8;9:e53683. doi: 10.7554/eLife.53683 (PMC7176437; doi:10.7554/eLife.53683)
Supplement: Figure 2—figure supplement 4—source data 1. [file elife-53683-fig2-figsupp4-data1.xlsx]

## Sheet: Tabelle1
MtTMEM175 from HEK cells	0.00206667	0.380421			MtTMEM175 from MC1061 expression	0.00161667	0.77527	1.64357	normalized
	0.00566669	0.380526				0.00521669	0.775171	1.64336
	0.00926671	0.380601				0.00881671	0.774984	1.64297
	0.0128667	0.380837				0.0124167	0.774737	1.64244
	0.0164668	0.381419				0.0160168	0.774502	1.64194
	0.0200668	0.382282				0.0196168	0.774322	1.64156
	0.0236668	0.383345				0.0232168	0.774192	1.64129
	0.0272668	0.384423				0.0268168	0.77405	1.64099
	0.0308669	0.385219				0.0304169	0.773851	1.64056
	0.0344669	0.385398				0.0340169	0.773593	1.64002
	0.0380669	0.385112				0.0376169	0.773339	1.63948
	0.0416669	0.384655				0.0412169	0.773143	1.63906
	0.0452669	0.384229				0.0448169	0.773023	1.63881
	0.048867	0.383763				0.048417	0.772972	1.6387
	0.052467	0.383272				0.052017	0.772964	1.63868
	0.056067	0.382587				0.055617	0.772935	1.63862
	0.059667	0.381469				0.059217	0.772838	1.63842
	0.0632671	0.380004				0.0628171	0.7727	1.63812
	0.0668671	0.378699				0.0664171	0.772604	1.63792
	0.0704671	0.378019				0.0700171	0.772563	1.63783
	0.0740671	0.378178				0.0736171	0.772526	1.63776
	0.0776672	0.379196				0.0772172	0.772483	1.63766
	0.0812672	0.380659				0.0808172	0.772482	1.63766
	0.0848672	0.38201				0.0844172	0.77253	1.63776
	0.0884672	0.383072				0.0880172	0.772595	1.6379
	0.0920672	0.384005				0.0916172	0.772677	1.63808
	0.0956673	0.384726				0.0952173	0.772795	1.63833
	0.0992673	0.385092				0.0988173	0.772937	1.63863
	0.102867	0.385075				0.102417	0.773051	1.63887
	0.106467	0.384548				0.106017	0.773131	1.63904
	0.110067	0.383197				0.109617	0.77325	1.63929
	0.113667	0.380968				0.113217	0.773471	1.63976
	0.117267	0.378156				0.116817	0.773758	1.64037
	0.120867	0.375392				0.120417	0.774039	1.64096
	0.124467	0.37308				0.124017	0.774293	1.6415
	0.128067	0.371342				0.127617	0.774523	1.64199
	0.131667	0.370114				0.131217	0.774709	1.64238
	0.135268	0.369511				0.134818	0.774843	1.64267
	0.138868	0.369556				0.138418	0.774976	1.64295
	0.142468	0.370171				0.142018	0.775152	1.64332
	0.146068	0.371336				0.145618	0.775336	1.64371
	0.149668	0.373016				0.149218	0.775434	1.64392
	0.153268	0.375027				0.152818	0.775415	1.64388
	0.156868	0.377027				0.156418	0.775318	1.64367
	0.160468	0.378745				0.160018	0.77518	1.64338
	0.164068	0.380078				0.163618	0.775018	1.64304
	0.167668	0.381252				0.167218	0.774875	1.64274
	0.171268	0.382482				0.170818	0.774802	1.64258
	0.174868	0.383639				0.174418	0.774795	1.64257
	0.178468	0.384444				0.178018	0.774822	1.64262
	0.182068	0.384827				0.181618	0.77486	1.6427
	0.185668	0.384761				0.185218	0.774921	1.64283
	0.189268	0.384327				0.188818	0.775003	1.64301
	0.192868	0.383889				0.192418	0.775069	1.64315
	0.196468	0.383682				0.196018	0.775096	1.6432
	0.200068	0.383484				0.199618	0.775102	1.64322
	0.203668	0.382945				0.203218	0.775095	1.6432
	0.207268	0.381941				0.206818	0.775046	1.6431
	0.210868	0.380596				0.210418	0.774949	1.64289
	0.214468	0.379233				0.214018	0.774832	1.64264
	0.218068	0.378194				0.217618	0.774698	1.64236
	0.221668	0.377676				0.221218	0.774552	1.64205
	0.225268	0.377649				0.224818	0.774421	1.64177
	0.228868	0.377799				0.228418	0.774323	1.64156
	0.232468	0.377843				0.232018	0.774263	1.64144
	0.236068	0.377994				0.235618	0.774249	1.64141
	0.239668	0.378653				0.239218	0.774313	1.64154
	0.243268	0.37994				0.242818	0.77446	1.64186
	0.246868	0.381717				0.246418	0.774689	1.64234
	0.250468	0.38379				0.250018	0.774948	1.64289
	0.254068	0.385719				0.253618	0.775187	1.6434
	0.257668	0.38704				0.257218	0.775362	1.64377
	0.261268	0.387663				0.260818	0.775449	1.64395
	0.264868	0.387694				0.264418	0.775466	1.64399
	0.268468	0.387279				0.268018	0.775478	1.64401
	0.272068	0.386486				0.271618	0.775513	1.64409
	0.275668	0.385364				0.275218	0.77553	1.64412
	0.279268	0.383909				0.278818	0.775475	1.64401
	0.282868	0.382354				0.282418	0.775344	1.64373
	0.286468	0.380847				0.286018	0.77514	1.6433
	0.290069	0.379457				0.289619	0.774874	1.64273
	0.293669	0.378209				0.293219	0.77458	1.64211
	0.297269	0.377187				0.296819	0.774339	1.6416
	0.300869	0.376234				0.300419	0.774166	1.64123
	0.304469	0.375435				0.304019	0.773996	1.64087
	0.308069	0.375064				0.307619	0.773798	1.64045
	0.311669	0.375161				0.311219	0.773604	1.64004
	0.315269	0.375458				0.314819	0.773441	1.63969
	0.318869	0.375863				0.318419	0.773317	1.63943
	0.322469	0.37618				0.322019	0.773276	1.63935
	0.326069	0.376233				0.325619	0.773341	1.63948
	0.329669	0.376164				0.329219	0.773519	1.63986
	0.333269	0.376366				0.332819	0.773786	1.64043
	0.336869	0.376979				0.336419	0.774089	1.64107
	0.340469	0.377868				0.340019	0.77438	1.64169
	0.344069	0.378671				0.343619	0.774653	1.64226
	0.347669	0.379112				0.347219	0.774893	1.64277
	0.351269	0.379354				0.350819	0.775059	1.64313
	0.354869	0.37971				0.354419	0.77514	1.6433
	0.358469	0.380266				0.358019	0.775155	1.64333
	0.362069	0.381134				0.361619	0.775104	1.64322
	0.365669	0.382496				0.365219	0.774976	1.64295
	0.369269	0.384137				0.368819	0.774758	1.64249
	0.372869	0.385516				0.372419	0.774485	1.64191
	0.376469	0.386581				0.376019	0.774228	1.64136
	0.380069	0.387727				0.379619	0.774022	1.64093
	0.383669	0.389102				0.383219	0.773855	1.64057
	0.387269	0.390472				0.386819	0.773772	1.6404
	0.390869	0.391715				0.390419	0.773836	1.64053
	0.394469	0.392862				0.394019	0.77403	1.64094
	0.398069	0.393729				0.397619	0.774284	1.64148
	0.401669	0.394				0.401219	0.774569	1.64209
	0.405269	0.393565				0.404819	0.774851	1.64268
	0.408869	0.392797				0.408419	0.775097	1.64321
	0.412469	0.391929				0.412019	0.77526	1.64355
	0.416069	0.390803				0.415619	0.77534	1.64372
	0.419669	0.38932				0.419219	0.775362	1.64377
	0.423269	0.387682				0.422819	0.775326	1.64369
	0.426869	0.385983				0.426419	0.775189	1.6434
	0.430469	0.384064				0.430019	0.774925	1.64284
	0.434069	0.382072				0.433619	0.774546	1.64204
	0.437669	0.380461				0.437219	0.774141	1.64118
	0.441269	0.379439				0.440819	0.773847	1.64056
	0.44487	0.378812				0.44442	0.773709	1.64026
	0.44847	0.378502				0.44802	0.773691	1.64022
	0.45207	0.37869				0.45162	0.773758	1.64037
	0.45567	0.379437				0.45522	0.773871	1.64061
	0.45927	0.380598				0.45882	0.77394	1.64075
	0.46287	0.38192				0.46242	0.773927	1.64073
	0.46647	0.383139				0.46602	0.773879	1.64062
	0.47007	0.383945				0.46962	0.773895	1.64066
	0.47367	0.384245				0.47322	0.774002	1.64088
	0.47727	0.384107				0.47682	0.774127	1.64115
	0.48087	0.383768				0.48042	0.774197	1.6413
	0.48447	0.3836				0.48402	0.774243	1.6414
	0.48807	0.383645				0.48762	0.774283	1.64148
	0.49167	0.383461				0.49122	0.774293	1.6415
	0.49527	0.382706				0.49482	0.774296	1.64151
	0.49887	0.381553				0.49842	0.77436	1.64164
	0.50247	0.380468				0.50202	0.774464	1.64186
	0.50607	0.379956				0.50562	0.774517	1.64198
	0.50967	0.380117				0.50922	0.774456	1.64185
	0.51327	0.380696				0.51282	0.774266	1.64144
	0.51687	0.381367				0.51642	0.77398	1.64084
	0.52047	0.381852				0.52002	0.773639	1.64011
	0.52407	0.381851				0.52362	0.773283	1.63936
	0.52767	0.381538				0.52722	0.772957	1.63867
	0.53127	0.381314				0.53082	0.77272	1.63817
	0.53487	0.381292				0.53442	0.772596	1.6379
	0.53847	0.381162				0.53802	0.772572	1.63785
	0.54207	0.380548				0.54162	0.772635	1.63799
	0.54567	0.379237				0.54522	0.772801	1.63834
	0.54927	0.377379				0.54882	0.773088	1.63895
	0.55287	0.375457				0.55242	0.773461	1.63974
	0.55647	0.373809				0.55602	0.773874	1.64061
	0.56007	0.372553				0.55962	0.774308	1.64153
	0.56367	0.371776				0.56322	0.774731	1.64243
	0.56727	0.371576				0.56682	0.775064	1.64314
	0.57087	0.371881				0.57042	0.775248	1.64353
	0.57447	0.372414				0.57402	0.77528	1.64359
	0.57807	0.373024				0.57762	0.775185	1.64339
	0.58167	0.373768				0.58122	0.774974	1.64294
	0.58527	0.374818				0.58482	0.774658	1.64227
	0.58887	0.376151				0.58842	0.774277	1.64147
	0.59247	0.377628				0.59202	0.77389	1.64065
	0.59607	0.379105				0.59562	0.77352	1.63986
	0.59967	0.380499				0.59922	0.773172	1.63912
	0.603271	0.381554				0.602821	0.772891	1.63853
	0.606871	0.382045				0.606421	0.772724	1.63817
	0.610471	0.382033				0.610021	0.77267	1.63806
	0.614071	0.381858				0.613621	0.7727	1.63812
	0.617671	0.381715				0.617221	0.77281	1.63836
	0.621271	0.38146				0.620821	0.772978	1.63871
	0.624871	0.380799				0.624421	0.773165	1.63911
	0.628471	0.37968				0.628021	0.77335	1.6395
	0.632071	0.378331				0.631621	0.773527	1.63988
	0.635671	0.376903				0.635221	0.773668	1.64018
	0.639271	0.37536				0.638821	0.773751	1.64035
	0.642871	0.373827				0.642421	0.773771	1.64039
	0.646471	0.372553				0.646021	0.773724	1.64029
	0.650071	0.371556				0.649621	0.773615	1.64006
	0.653671	0.370636				0.653221	0.773455	1.63972
	0.657271	0.369957				0.656821	0.773253	1.6393
	0.660871	0.369753				0.660421	0.773018	1.6388
	0.664471	0.369826				0.664021	0.772754	1.63824
	0.668071	0.369804				0.667621	0.772456	1.63761
	0.671671	0.369672				0.671221	0.77215	1.63696
	0.675271	0.3696				0.674821	0.771921	1.63647
	0.678871	0.369662				0.678421	0.77183	1.63628
	0.682471	0.36981				0.682021	0.771858	1.63634
	0.686071	0.370056				0.685621	0.771971	1.63658
	0.689671	0.370426				0.689221	0.772145	1.63695
	0.693271	0.370912				0.692821	0.772335	1.63735
	0.696871	0.37136				0.696421	0.772517	1.63774
	0.700471	0.371944				0.700021	0.772733	1.63819
	0.704071	0.3729				0.703621	0.773012	1.63879
	0.707671	0.374207				0.707221	0.773338	1.63948
	0.711271	0.375469				0.710821	0.773674	1.64019
	0.714871	0.376426				0.714421	0.77397	1.64082
	0.718471	0.376912				0.718021	0.774186	1.64127
	0.722071	0.376833				0.721621	0.774353	1.64163
	0.725671	0.376357				0.725221	0.774523	1.64199
	0.729271	0.375692				0.728821	0.774718	1.6424
	0.732871	0.37499				0.732421	0.774917	1.64282
	0.736471	0.374276				0.736021	0.775077	1.64316
	0.740071	0.3736				0.739621	0.775183	1.64339
	0.743671	0.372912				0.743221	0.775263	1.64356
	0.747271	0.372158				0.746821	0.775335	1.64371
	0.750871	0.371185				0.750421	0.775413	1.64388
	0.754471	0.370053				0.754021	0.775534	1.64413
	0.758072	0.369201				0.757622	0.775697	1.64448
	0.761672	0.368938				0.761222	0.77585	1.6448
	0.765272	0.369133				0.764822	0.775935	1.64498
	0.768872	0.36968				0.768422	0.775945	1.645
	0.772472	0.370629				0.772022	0.775897	1.6449
	0.776072	0.371599				0.775622	0.775807	1.64471
	0.779672	0.372001				0.779222	0.775681	1.64444
	0.783272	0.371817				0.782822	0.775522	1.64411
	0.786872	0.371507				0.786422	0.775338	1.64372
	0.790472	0.371445				0.790022	0.775131	1.64328
	0.794072	0.37143				0.793622	0.774876	1.64274
	0.797672	0.371183				0.797222	0.774548	1.64204
	0.801272	0.370755				0.800822	0.774171	1.64124
	0.804872	0.370353				0.804422	0.773823	1.6405
	0.808472	0.369708				0.808022	0.773556	1.63994
	0.812072	0.368794				0.811622	0.773397	1.6396
	0.815672	0.368131				0.815222	0.773313	1.63942
	0.819272	0.368062				0.818822	0.773271	1.63933
	0.822872	0.368472				0.822422	0.773242	1.63927
	0.826472	0.369294				0.826022	0.773198	1.63918
	0.830072	0.370507				0.829622	0.773156	1.63909
	0.833672	0.37182				0.833222	0.773192	1.63917
	0.837272	0.372806				0.836822	0.773355	1.63951
	0.840872	0.373059				0.840422	0.773601	1.64003
	0.844472	0.372381				0.844022	0.773875	1.64061
	0.848072	0.370956				0.847622	0.7741	1.64109
	0.851672	0.369145				0.851222	0.774249	1.64141
	0.855272	0.367074				0.854822	0.77434	1.6416
	0.858872	0.364909				0.858422	0.774404	1.64174
	0.862472	0.363042				0.862022	0.774462	1.64186
	0.866072	0.361806				0.865622	0.774556	1.64206
	0.869672	0.361201				0.869222	0.774673	1.64231
	0.873272	0.361219				0.872822	0.774781	1.64254
	0.876872	0.361866				0.876422	0.774883	1.64275
	0.880472	0.363045				0.880022	0.774995	1.64299
	0.884072	0.364613				0.883622	0.775082	1.64317
	0.887672	0.366417				0.887222	0.775133	1.64328
	0.891272	0.368403				0.890822	0.775141	1.6433
	0.894872	0.370505				0.894422	0.775105	1.64322
	0.898472	0.372396				0.898022	0.775043	1.64309
	0.902072	0.373554				0.901622	0.774984	1.64297
	0.905672	0.373899				0.905222	0.774939	1.64287
	0.909272	0.37377				0.908822	0.774914	1.64282
	0.912872	0.373507				0.912422	0.774884	1.64275
	0.916473	0.373445				0.916023	0.774808	1.64259
	0.920073	0.373962				0.919623	0.7747	1.64236
	0.923673	0.374883				0.923223	0.774591	1.64213
	0.927273	0.375698				0.926823	0.77448	1.6419
	0.930873	0.37602				0.930423	0.774373	1.64167
	0.934473	0.375877				0.934023	0.774289	1.64149
	0.938073	0.375419				0.937623	0.774193	1.64129
	0.941673	0.374865				0.941223	0.774037	1.64096
	0.945273	0.374426				0.944823	0.773822	1.6405
	0.948873	0.374272				0.948423	0.773551	1.63993
	0.952473	0.374342				0.952023	0.773218	1.63922
	0.956073	0.374278				0.955623	0.77285	1.63844
	0.959673	0.373896				0.959223	0.772533	1.63777
	0.963273	0.373509				0.962823	0.77232	1.63732
	0.966873	0.37363				0.966423	0.772204	1.63707
	0.970473	0.374372				0.970023	0.772141	1.63694
	0.974073	0.375571				0.973623	0.772095	1.63684
	0.977673	0.377171				0.977223	0.772027	1.6367
	0.981273	0.378892				0.980823	0.77188	1.63639
	0.984873	0.38008				0.984423	0.771666	1.63593
	0.988473	0.380242				0.988023	0.771481	1.63554
	0.992073	0.379682				0.991623	0.771403	1.63537
	0.995673	0.378831				0.995223	0.771412	1.63539
	0.999273	0.377832				0.998823	0.771487	1.63555
	1.00287	0.376678				1.00242	0.771624	1.63584
	1.00647	0.375509				1.00602	0.771768	1.63615
	1.01007	0.374455				1.00962	0.771852	1.63633
	1.01367	0.37348				1.01322	0.771883	1.63639
	1.01727	0.372589				1.01682	0.771917	1.63646
	1.02087	0.371966				1.02042	0.771972	1.63658
	1.02447	0.371842				1.02402	0.772049	1.63674
	1.02807	0.372037				1.02762	0.772188	1.63704
	1.03167	0.372262				1.03122	0.772393	1.63747
	1.03527	0.372399				1.03482	0.772588	1.63789
	1.03887	0.372265				1.03842	0.772688	1.6381
	1.04247	0.371692				1.04202	0.772697	1.63812
	1.04607	0.370916				1.04562	0.772659	1.63804
	1.04967	0.370199				1.04922	0.772601	1.63791
	1.05327	0.369445				1.05282	0.772541	1.63779
	1.05687	0.368519				1.05642	0.772506	1.63771
	1.06047	0.367601				1.06002	0.772496	1.63769
	1.06407	0.366748				1.06362	0.772435	1.63756
	1.06767	0.365797				1.06722	0.772257	1.63718
	1.07127	0.364761				1.07082	0.771996	1.63663
	1.07487	0.364039				1.07442	0.771759	1.63613
	1.07847	0.363896				1.07802	0.771635	1.63587
	1.08207	0.364135				1.08162	0.771646	1.63589
	1.08567	0.364489				1.08522	0.771802	1.63622
	1.08927	0.365				1.08882	0.772037	1.63672
	1.09287	0.365799				1.09242	0.772275	1.63722
	1.09647	0.366761				1.09602	0.77246	1.63762
	1.10007	0.367862				1.09962	0.772594	1.6379
	1.10367	0.369344				1.10322	0.772701	1.63813
	1.10727	0.371143				1.10682	0.77282	1.63838
	1.11087	0.372781				1.11042	0.772946	1.63865
	1.11447	0.373944				1.11402	0.773039	1.63884
	1.11807	0.374744				1.11762	0.773072	1.63891
	1.12167	0.375162				1.12122	0.773052	1.63887
	1.12527	0.375019				1.12482	0.773012	1.63879
	1.12887	0.374292				1.12842	0.773016	1.63879
	1.13247	0.373253				1.13202	0.773091	1.63895
	1.13607	0.372015				1.13562	0.773218	1.63922
	1.13967	0.37063				1.13922	0.773382	1.63957
	1.14327	0.36931				1.14282	0.773567	1.63996
	1.14687	0.368408				1.14642	0.773736	1.64032
	1.15047	0.367942				1.15002	0.77387	1.6406
	1.15407	0.367536				1.15362	0.773996	1.64087
	1.15767	0.366921				1.15722	0.774152	1.6412
	1.16127	0.366327				1.16082	0.774351	1.64162
	1.16487	0.366132				1.16442	0.774572	1.64209
	1.16847	0.366347				1.16802	0.774791	1.64256
	1.17207	0.366776				1.17162	0.774999	1.643
	1.17567	0.367316				1.17522	0.775172	1.64336
	1.17927	0.367759				1.17882	0.775275	1.64358
	1.18287	0.367771				1.18242	0.775298	1.64363
	1.18647	0.367281				1.18602	0.775276	1.64359
	1.19007	0.366663				1.18962	0.775207	1.64344
	1.19367	0.366107				1.19322	0.775062	1.64313
	1.19727	0.365641				1.19682	0.774815	1.64261
	1.20087	0.365297				1.20042	0.774476	1.64189
	1.20447	0.365176				1.20402	0.774083	1.64106
	1.20807	0.365257				1.20762	0.773677	1.6402
	1.21167	0.36551				1.21122	0.773261	1.63931
	1.21527	0.365923				1.21482	0.772852	1.63845
	1.21887	0.366454				1.21842	0.772472	1.63764
	1.22247	0.366993				1.22202	0.772102	1.63686
	1.22607	0.367409				1.22562	0.771695	1.63599
	1.22967	0.36772				1.22922	0.771272	1.6351
	1.23327	0.367988				1.23282	0.770901	1.63431
	1.23687	0.367803				1.23642	0.770613	1.6337
	1.24047	0.366669				1.24002	0.770384	1.63321
	1.24407	0.364756				1.24362	0.770233	1.63289
	1.24767	0.362686				1.24722	0.770207	1.63284
	1.25127	0.360685				1.25082	0.770305	1.63305
	1.25487	0.358969				1.25442	0.770461	1.63338
	1.25847	0.357975				1.25802	0.770685	1.63385
	1.26207	0.357791				1.26162	0.771012	1.63455
	1.26567	0.358044				1.26522	0.771406	1.63538
	1.26927	0.358499				1.26882	0.771764	1.63614
	1.27287	0.35939				1.27242	0.772039	1.63672
	1.27647	0.360875				1.27602	0.772243	1.63716
	1.28007	0.362758				1.27962	0.772361	1.63741
	1.28367	0.364504				1.28322	0.7724	1.63749
	1.28727	0.365851				1.28682	0.772417	1.63752
	1.29087	0.366723				1.29042	0.772484	1.63767
	1.29447	0.36704				1.29402	0.772591	1.63789
	1.29807	0.366769				1.29762	0.772691	1.6381
	1.30167	0.366201				1.30122	0.772759	1.63825
	1.30528	0.365527				1.30483	0.772816	1.63837
	1.30888	0.364841				1.30843	0.772878	1.6385
	1.31248	0.364307				1.31203	0.77295	1.63865
	1.31608	0.364125				1.31563	0.773053	1.63887
	1.31968	0.364265				1.31923	0.773177	1.63914
	1.32328	0.364671				1.32283	0.773255	1.6393
	1.32688	0.365306				1.32643	0.77323	1.63925
	1.33048	0.36607				1.33003	0.773111	1.639
	1.33408	0.366845				1.33363	0.772938	1.63863
	1.33768	0.367704				1.33723	0.77277	1.63827
	1.34128	0.368663				1.34083	0.772683	1.63809
	1.34488	0.369444				1.34443	0.772689	1.6381
	1.34848	0.369612				1.34803	0.772739	1.63821
	1.35208	0.369078				1.35163	0.77278	1.63829
	1.35568	0.368007				1.35523	0.772787	1.63831
	1.35928	0.366655				1.35883	0.772732	1.63819
	1.36288	0.365304				1.36243	0.77264	1.638
	1.36648	0.364392				1.36603	0.772576	1.63786
	1.37008	0.364007				1.36963	0.772579	1.63787
	1.37368	0.363866				1.37323	0.772614	1.63794
	1.37728	0.363735				1.37683	0.772639	1.63799
	1.38088	0.363658				1.38043	0.772652	1.63802
	1.38448	0.363639				1.38403	0.772682	1.63809
	1.38808	0.363662				1.38763	0.772738	1.6382
	1.39168	0.363773				1.39123	0.77282	1.63838
	1.39528	0.36404				1.39483	0.772938	1.63863
	1.39888	0.364282				1.39843	0.773107	1.63899
	1.40248	0.364302				1.40203	0.773281	1.63936
	1.40608	0.364057				1.40563	0.773431	1.63967
	1.40968	0.3637				1.40923	0.773572	1.63997
	1.41328	0.363164				1.41283	0.773728	1.6403
	1.41688	0.362365				1.41643	0.773875	1.64061
	1.42048	0.361488				1.42003	0.773992	1.64086
	1.42408	0.360746				1.42363	0.774092	1.64108
	1.42768	0.359966				1.42723	0.774175	1.64125
	1.43128	0.359035				1.43083	0.774241	1.64139
	1.43488	0.358073				1.43443	0.774288	1.64149
	1.43848	0.357157				1.43803	0.774318	1.64155
	1.44208	0.356163				1.44163	0.774323	1.64156
	1.44568	0.355185				1.44523	0.774299	1.64151
	1.44928	0.35446				1.44883	0.774239	1.64139
	1.45288	0.354092				1.45243	0.774144	1.64119
	1.45648	0.353716				1.45603	0.774033	1.64095
	1.46008	0.353145				1.45963	0.773936	1.64074
	1.46368	0.352634				1.46323	0.773843	1.64055
	1.46728	0.35244				1.46683	0.77375	1.64035
	1.47088	0.352371				1.47043	0.77367	1.64018
	1.47448	0.352437				1.47403	0.77362	1.64007
	1.47808	0.352798				1.47763	0.773583	1.64
	1.48168	0.353207				1.48123	0.773551	1.63993
	1.48528	0.353246				1.48483	0.773513	1.63985
	1.48888	0.353028				1.48843	0.773451	1.63972
	1.49248	0.353155				1.49203	0.773317	1.63943
	1.49608	0.353949				1.49563	0.77307	1.63891
	1.49968	0.355227				1.49923	0.772725	1.63818
	1.50328	0.356679				1.50283	0.772323	1.63732
	1.50688	0.358263				1.50643	0.7719	1.63643
	1.51048	0.359765				1.51003	0.771494	1.63557
	1.51408	0.360825				1.51363	0.771163	1.63487
	1.51768	0.361466				1.51723	0.770919	1.63435
	1.52128	0.362048				1.52083	0.770752	1.63399
	1.52488	0.362629				1.52443	0.770658	1.63379
	1.52848	0.363046				1.52803	0.770646	1.63377
	1.53208	0.363233				1.53163	0.770714	1.63391
	1.53568	0.363201				1.53523	0.77084	1.63418
	1.53928	0.362873				1.53883	0.771011	1.63454
	1.54288	0.362265				1.54243	0.771219	1.63498
	1.54648	0.361511				1.54603	0.771433	1.63544
	1.55008	0.360602				1.54963	0.77157	1.63573
	1.55368	0.359421				1.55323	0.771615	1.63582
	1.55728	0.35801				1.55683	0.7716	1.63579
	1.56088	0.356594				1.56043	0.771557	1.6357
	1.56448	0.355202				1.56403	0.771501	1.63558
	1.56808	0.353741				1.56763	0.771495	1.63557
	1.57168	0.352294				1.57123	0.77158	1.63575
	1.57528	0.35108				1.57483	0.77176	1.63613
	1.57888	0.350173				1.57843	0.77199	1.63662
	1.58248	0.349437				1.58203	0.772229	1.63713
	1.58608	0.348975				1.58563	0.772471	1.63764
	1.58968	0.348985				1.58923	0.772729	1.63819
	1.59328	0.349209				1.59283	0.772955	1.63866
	1.59688	0.349196				1.59643	0.773092	1.63896
	1.60048	0.348727				1.60003	0.773147	1.63907
	1.60408	0.347768				1.60363	0.773149	1.63908
	1.60768	0.346173				1.60723	0.773092	1.63896
	1.61128	0.344092				1.61083	0.772999	1.63876
	1.61488	0.341881				1.61443	0.772909	1.63857
	1.61848	0.340034				1.61803	0.772828	1.6384
	1.62208	0.338696				1.62163	0.772738	1.6382
	1.62568	0.337729				1.62523	0.77262	1.63795
	1.62928	0.337077				1.62883	0.772473	1.63764
	1.63288	0.336902				1.63243	0.772301	1.63728
	1.63648	0.337163				1.63603	0.77213	1.63692
	1.64008	0.337836				1.63963	0.771991	1.63662
	1.64368	0.339293				1.64323	0.77188	1.63639
	1.64728	0.341684				1.64683	0.771767	1.63615
	1.65088	0.344536				1.65043	0.77161	1.63581
	1.65448	0.347151				1.65403	0.771383	1.63533
	1.65808	0.349117				1.65763	0.771094	1.63472
	1.66168	0.350485				1.66123	0.770789	1.63407
	1.66528	0.351476				1.66483	0.770524	1.63351
	1.66888	0.352311				1.66843	0.77036	1.63316
	1.67248	0.353114				1.67203	0.770334	1.63311
	1.67608	0.354059				1.67563	0.770371	1.63319
	1.67968	0.354776				1.67923	0.770377	1.6332
	1.68328	0.354922				1.68283	0.770333	1.63311
	1.68688	0.354569				1.68643	0.770305	1.63305
	1.69048	0.354022				1.69003	0.770354	1.63315
	1.69408	0.35342				1.69363	0.770541	1.63355
	1.69768	0.352972				1.69723	0.770864	1.63423
	1.70128	0.352945				1.70083	0.771249	1.63505
	1.70488	0.353366				1.70443	0.771619	1.63583
	1.70848	0.354119				1.70803	0.771891	1.63641
	1.71208	0.355085				1.71163	0.772042	1.63673
	1.71568	0.356224				1.71523	0.772106	1.63686
	1.71928	0.357306				1.71883	0.77216	1.63698
	1.72288	0.357986				1.72243	0.772184	1.63703
	1.72648	0.358202				1.72603	0.772144	1.63695
	1.73008	0.358211				1.72963	0.772019	1.63668
	1.73368	0.358032				1.73323	0.771834	1.63629
	1.73728	0.357508				1.73683	0.771623	1.63584
	1.74088	0.356615				1.74043	0.771412	1.63539
	1.74448	0.355466				1.74403	0.771197	1.63494
	1.74808	0.354146				1.74763	0.771012	1.63455
	1.75168	0.352756				1.75123	0.770928	1.63437
	1.75528	0.351545				1.75483	0.77094	1.63439
	1.75888	0.350847				1.75843	0.771003	1.63453
	1.76248	0.35074				1.76203	0.771092	1.63472
	1.76608	0.350917				1.76563	0.771194	1.63493
	1.76968	0.351164				1.76923	0.771253	1.63506
	1.77328	0.351559				1.77283	0.771264	1.63508
	1.77688	0.352071				1.77643	0.771286	1.63513
	1.78048	0.352562				1.78003	0.771392	1.63535
	1.78408	0.352971				1.78363	0.771618	1.63583
	1.78768	0.353232				1.78723	0.771905	1.63644
	1.79128	0.353208				1.79083	0.77215	1.63696
	1.79488	0.352952				1.79443	0.772324	1.63733
	1.79848	0.352626				1.79803	0.772472	1.63764
	1.80208	0.352453				1.80163	0.772629	1.63797
	1.80568	0.352551				1.80523	0.772813	1.63836
	1.80928	0.352761				1.80883	0.773023	1.63881
	1.81288	0.352649				1.81243	0.773183	1.63915
	1.81648	0.351958				1.81603	0.773216	1.63922
	1.82008	0.350773				1.81963	0.773075	1.63892
	1.82368	0.349467				1.82323	0.772787	1.63831
	1.82728	0.348471				1.82683	0.772431	1.63755
	1.83088	0.348078				1.83043	0.772102	1.63686
	1.83448	0.348286				1.83403	0.771809	1.63624
	1.83808	0.348892				1.83763	0.771528	1.63564
	1.84168	0.349804				1.84123	0.771264	1.63508
	1.84528	0.350818				1.84483	0.771041	1.63461
	1.84888	0.351779				1.84843	0.770914	1.63434
	1.85248	0.35263				1.85203	0.770957	1.63443
	1.85608	0.353442				1.85563	0.771188	1.63492
	1.85968	0.353994				1.85923	0.771533	1.63565
	1.86328	0.354036				1.86283	0.771898	1.63642
	1.86688	0.353531				1.86643	0.772212	1.63709
	1.87048	0.352631				1.87003	0.772448	1.63759
	1.87408	0.351569				1.87363	0.772593	1.6379
	1.87768	0.350459				1.87723	0.772659	1.63804
	1.88128	0.349377				1.88083	0.772675	1.63807
	1.88488	0.348632				1.88443	0.77265	1.63802
	1.88848	0.348639				1.88803	0.772535	1.63777
	1.89208	0.349435				1.89163	0.772324	1.63733
	1.89568	0.350748				1.89523	0.772078	1.63681
	1.89928	0.352256				1.89883	0.771861	1.63635
	1.90288	0.353531				1.90243	0.771708	1.63602
	1.90648	0.354309				1.90603	0.771659	1.63592
	1.91008	0.354568				1.90963	0.771713	1.63603
	1.91368	0.35451				1.91323	0.771842	1.63631
	1.91728	0.354285				1.91683	0.772035	1.63671
	1.92088	0.353936				1.92043	0.772303	1.63728
	1.92448	0.353298				1.92403	0.772622	1.63796
	1.92808	0.352232				1.92763	0.772958	1.63867
	1.93168	0.350858				1.93123	0.773264	1.63932
	1.93528	0.349553				1.93483	0.773488	1.63979
	1.93888	0.348885				1.93843	0.773558	1.63994
	1.94248	0.349116				1.94203	0.773427	1.63967
	1.94608	0.349881				1.94563	0.773117	1.63901
	1.94968	0.350387				1.94923	0.772747	1.63822
	1.95328	0.350212				1.95283	0.772378	1.63744
	1.95688	0.349428				1.95643	0.771992	1.63662
	1.96048	0.348335				1.96003	0.771611	1.63582
	1.96408	0.34718				1.96363	0.771291	1.63514
	1.96768	0.346221				1.96723	0.771012	1.63455
	1.97128	0.34567				1.97083	0.770778	1.63405
	1.97488	0.345433				1.97443	0.77067	1.63382
	1.97848	0.34523				1.97803	0.770771	1.63403
	1.98208	0.344958				1.98163	0.771063	1.63465
	1.98568	0.344906				1.98523	0.771452	1.63548
	1.98928	0.345318				1.98883	0.771836	1.63629
	1.99288	0.346062				1.99243	0.772147	1.63695
	1.99648	0.346912				1.99603	0.772314	1.63731
	2.00008	0.347885				1.99963	0.772281	1.63724
	2.00368	0.349116				2.00323	0.772096	1.63684
	2.00728	0.3504				2.00683	0.771848	1.63632
	2.01088	0.351306				2.01043	0.771573	1.63573
	2.01448	0.35161				2.01403	0.771275	1.6351
	2.01808	0.351376				2.01763	0.770948	1.63441
	2.02168	0.350624				2.02123	0.770581	1.63363
	2.02528	0.349419				2.02483	0.770172	1.63276
	2.02888	0.348083				2.02843	0.769759	1.63189
	2.03248	0.347005				2.03203	0.769389	1.6311
	2.03608	0.346241				2.03563	0.769111	1.63052
	2.03968	0.345567				2.03923	0.768941	1.63015
	2.04328	0.344908				2.04283	0.768887	1.63004
	2.04688	0.344394				2.04643	0.768931	1.63013
	2.05048	0.344052				2.05003	0.769004	1.63029
	2.05408	0.343716				2.05363	0.769081	1.63045
	2.05768	0.343559				2.05723	0.769215	1.63074
	2.06128	0.343883				2.06083	0.769436	1.6312
	2.06488	0.344802				2.06443	0.769682	1.63173
	2.06848	0.346014				2.06803	0.769928	1.63225
	2.07208	0.347291				2.07163	0.770203	1.63283
	2.07568	0.348377				2.07523	0.770479	1.63342
	2.07928	0.349074				2.07883	0.770685	1.63385
	2.08288	0.349323				2.08243	0.770789	1.63407
	2.08648	0.349327				2.08603	0.770836	1.63417
	2.09008	0.349496				2.08963	0.770885	1.63428
	2.09368	0.350102				2.09323	0.770937	1.63439
	2.09728	0.35099				2.09683	0.770968	1.63445
	2.10088	0.35173				2.10043	0.771002	1.63452
	2.10448	0.352139				2.10403	0.771053	1.63463
	2.10808	0.352315				2.10763	0.771057	1.63464
	2.11168	0.352398				2.11123	0.770993	1.63451
	2.11528	0.35254				2.11483	0.770903	1.63431
	2.11888	0.352859				2.11843	0.770813	1.63412
	2.12248	0.353223				2.12203	0.770723	1.63393
	2.12608	0.353339				2.12563	0.770651	1.63378
	2.12968	0.352922				2.12923	0.770571	1.63361
	2.13328	0.351731				2.13283	0.770464	1.63338
	2.13688	0.349998				2.13643	0.770347	1.63314
	2.14048	0.348274				2.14003	0.770219	1.63286
	2.14408	0.346931				2.14363	0.770087	1.63258
	2.14768	0.346002				2.14723	0.769951	1.6323
	2.15128	0.345577				2.15083	0.769801	1.63198
	2.15488	0.345465				2.15443	0.769638	1.63163
	2.15848	0.345503				2.15803	0.76952	1.63138
	2.16208	0.345623				2.16163	0.769458	1.63125
	2.16568	0.345788				2.16523	0.769432	1.6312
	2.16928	0.345934				2.16883	0.769452	1.63124
	2.17288	0.346065				2.17243	0.76953	1.6314
	2.17648	0.345943				2.17603	0.769668	1.6317
	2.18008	0.345339				2.17963	0.769868	1.63212
	2.18368	0.344274				2.18323	0.770161	1.63274
	2.18728	0.342851				2.18683	0.770513	1.63349
	2.19088	0.341149				2.19043	0.770876	1.63426
	2.19448	0.339422				2.19403	0.771195	1.63493
	2.19808	0.337794				2.19763	0.771428	1.63543
	2.20168	0.336496				2.20123	0.771545	1.63568
	2.20528	0.335887				2.20483	0.771558	1.6357
	2.20888	0.336189				2.20843	0.771485	1.63555
	2.21248	0.337271				2.21203	0.771326	1.63521
	2.21608	0.338929				2.21563	0.771083	1.6347
	2.21968	0.340992				2.21923	0.77075	1.63399
	2.22328	0.343244				2.22283	0.770373	1.63319
	2.22688	0.345489				2.22643	0.770043	1.63249
	2.23048	0.347697				2.23003	0.76977	1.63191
	2.23408	0.349929				2.23363	0.769489	1.63132
	2.23768	0.351985				2.23723	0.76923	1.63077
	2.24128	0.353451				2.24083	0.769038	1.63036
	2.24488	0.354151				2.24443	0.768875	1.63001
	2.24848	0.35423				2.24803	0.768728	1.6297
	2.25208	0.353874				2.25163	0.768645	1.62953
	2.25568	0.353251				2.25523	0.768653	1.62954
	2.25928	0.352421				2.25883	0.768699	1.62964
	2.26288	0.351364				2.26243	0.768746	1.62974
	2.26648	0.350077				2.26603	0.768801	1.62986
	2.27008	0.348706				2.26963	0.76891	1.63009
	2.27368	0.347471				2.27323	0.769058	1.6304
	2.27728	0.346708				2.27683	0.769197	1.6307
	2.28088	0.346482				2.28043	0.769334	1.63099
	2.28448	0.346664				2.28403	0.769489	1.63132
	2.28808	0.347014				2.28763	0.769624	1.6316
	2.29168	0.347337				2.29123	0.769703	1.63177
	2.29528	0.347444				2.29483	0.769767	1.63191
	2.29888	0.347388				2.29843	0.769829	1.63204
	2.30248	0.347334				2.30203	0.769865	1.63211
	2.30608	0.347292				2.30563	0.769868	1.63212
	2.30968	0.347084				2.30923	0.769889	1.63216
	2.31328	0.346698				2.31283	0.769954	1.6323
	2.31688	0.346223				2.31643	0.770021	1.63244
	2.32048	0.345802				2.32003	0.770068	1.63254
	2.32408	0.345483				2.32363	0.770137	1.63269
	2.32768	0.345177				2.32723	0.77026	1.63295
	2.33128	0.344714				2.33083	0.770394	1.63324
	2.33488	0.344128				2.33443	0.770473	1.6334
	2.33848	0.343518				2.33803	0.770464	1.63338
	2.34208	0.342973				2.34163	0.770359	1.63316
	2.34568	0.342631				2.34523	0.770137	1.63269
	2.34928	0.342579				2.34883	0.76981	1.632
	2.35288	0.342774				2.35243	0.769458	1.63125
	2.35648	0.343078				2.35603	0.769155	1.63061
	2.36008	0.343316				2.35963	0.768887	1.63004
	2.36368	0.343453				2.36323	0.76859	1.62941
	2.36728	0.343566				2.36683	0.768242	1.62867
	2.37088	0.343658				2.37043	0.767894	1.62794
	2.37448	0.343545				2.37403	0.767629	1.62737
	2.37808	0.343159				2.37763	0.76749	1.62708
	2.38168	0.342602				2.38123	0.767455	1.627
	2.38528	0.342163				2.38483	0.767487	1.62707
	2.38888	0.342105				2.38843	0.767563	1.62723
	2.39248	0.342343				2.39203	0.767661	1.62744
	2.39608	0.34272				2.39563	0.767745	1.62762
	2.39968	0.343186				2.39923	0.767817	1.62777
	2.40328	0.343736				2.40283	0.767921	1.62799
	2.40688	0.344148				2.40643	0.768066	1.6283
	2.41048	0.344464				2.41003	0.768205	1.62859
	2.41408	0.344959				2.41363	0.768316	1.62883
	2.41768	0.345508				2.41723	0.768459	1.62913
	2.42128	0.345521				2.42083	0.768696	1.62964
	2.42488	0.344677				2.42443	0.769008	1.6303
	2.42848	0.343304				2.42803	0.769324	1.63097
	2.43208	0.341673				2.43163	0.769604	1.63156
	2.43568	0.340013				2.43523	0.769843	1.63207
	2.43928	0.338622				2.43883	0.770049	1.6325
	2.44288	0.337954				2.44243	0.770251	1.63293
	2.44648	0.338078				2.44603	0.770487	1.63343
	2.45008	0.338642				2.44963	0.770777	1.63405
	2.45368	0.339218				2.45323	0.77107	1.63467
	2.45728	0.339708				2.45683	0.771264	1.63508
	2.46088	0.340214				2.46043	0.771301	1.63516
	2.46448	0.340536				2.46403	0.771235	1.63502
	2.46808	0.340592				2.46763	0.771115	1.63476
	2.47168	0.340581				2.47123	0.770957	1.63443
	2.47528	0.340839				2.47483	0.770786	1.63407
	2.47888	0.341364				2.47843	0.770601	1.63367
	2.48248	0.342117				2.48203	0.770333	1.63311
	2.48608	0.342957				2.48563	0.769945	1.63228
	2.48968	0.343848				2.48923	0.769496	1.63133
	2.49328	0.344899				2.49283	0.769084	1.63046
	2.49688	0.346073				2.49643	0.768768	1.62979
	2.50048	0.347138				2.50003	0.768561	1.62935
	2.50408	0.347969				2.50363	0.768446	1.62911
	2.50768	0.348527				2.50723	0.768411	1.62903
	2.51128	0.348416				2.51083	0.768397	1.629
	2.51488	0.347242				2.51443	0.76837	1.62894
	2.51848	0.345115				2.51803	0.768355	1.62891
	2.52208	0.342544				2.52163	0.768412	1.62903
	2.52568	0.339999				2.52523	0.768515	1.62925
	2.52928	0.337694				2.52883	0.768594	1.62942
	2.53288	0.335762				2.53243	0.768625	1.62949
	2.53648	0.334324				2.53603	0.768631	1.6295
	2.54008	0.333305				2.53963	0.768613	1.62946
	2.54368	0.332513				2.54323	0.76859	1.62941
	2.54728	0.331984				2.54683	0.768615	1.62946
	2.55088	0.332046				2.55043	0.768708	1.62966
	2.55448	0.332725				2.55403	0.768853	1.62997
	2.55808	0.333772				2.55763	0.769065	1.63042
	2.56168	0.334916				2.56123	0.76934	1.631
	2.56528	0.336022				2.56483	0.769654	1.63167
	2.56888	0.337153				2.56843	0.769986	1.63237
	2.57248	0.338364				2.57203	0.770295	1.63303
	2.57608	0.339718				2.57563	0.770524	1.63351
	2.57968	0.341332				2.57923	0.770654	1.63379
	2.58328	0.343256				2.58283	0.770728	1.63394
	2.58688	0.3451				2.58643	0.7708	1.6341
	2.59048	0.346456				2.59003	0.770896	1.6343
	2.59408	0.347237				2.59363	0.770971	1.63446
	2.59768	0.347451				2.59723	0.770959	1.63443
	2.60128	0.347222				2.60083	0.770847	1.6342
	2.60488	0.34673				2.60443	0.770649	1.63378
	2.60848	0.346083				2.60803	0.770399	1.63325
	2.61208	0.345238				2.61163	0.770182	1.63279
	2.61568	0.344114				2.61523	0.770085	1.63258
	2.61928	0.342572				2.61883	0.770103	1.63262
	2.62288	0.3407				2.62243	0.770157	1.63273
	2.62648	0.338759				2.62603	0.770182	1.63279
	2.63008	0.336934				2.62963	0.770163	1.63275
	2.63368	0.335556				2.63323	0.77013	1.63268
	2.63728	0.334869				2.63683	0.77012	1.63265
	2.64088	0.334682				2.64043	0.770159	1.63274
	2.64448	0.334673				2.64403	0.770263	1.63296
	2.64808	0.334881				2.64763	0.770399	1.63325
	2.65168	0.335127				2.65123	0.770492	1.63344
	2.65528	0.335214				2.65483	0.770491	1.63344
	2.65888	0.335153				2.65843	0.770412	1.63327
	2.66248	0.335045				2.66203	0.770293	1.63302
	2.66608	0.334815				2.66563	0.770141	1.6327
	2.66968	0.334255				2.66923	0.769956	1.63231
	2.67328	0.333023				2.67283	0.769754	1.63188
	2.67688	0.331313				2.67643	0.769576	1.6315
	2.68048	0.32961				2.68003	0.769474	1.63128
	2.68408	0.328007				2.68363	0.769503	1.63135
	2.68768	0.326507				2.68723	0.769661	1.63168
	2.69128	0.325533				2.69083	0.769876	1.63214
	2.69488	0.325128				2.69443	0.77005	1.63251
	2.69848	0.324993				2.69803	0.770104	1.63262
	2.70208	0.325104				2.70163	0.770045	1.6325
	2.70568	0.325686				2.70523	0.769962	1.63232
	2.70928	0.326771				2.70883	0.769945	1.63228
	2.71288	0.328125				2.71243	0.770029	1.63246
	2.71648	0.329292				2.71603	0.770158	1.63273
	2.72008	0.330041				2.71963	0.770203	1.63283
	2.72368	0.330529				2.72323	0.770071	1.63255
	2.72728	0.330727				2.72683	0.769812	1.632
	2.73088	0.330503				2.73043	0.769505	1.63135
	2.73448	0.329932				2.73403	0.769215	1.63074
	2.73808	0.329106				2.73763	0.768986	1.63025
	2.74168	0.327924				2.74123	0.768814	1.62989
	2.74528	0.326422				2.74483	0.768637	1.62951
	2.74888	0.325046				2.74843	0.768396	1.629
	2.75248	0.324151				2.75203	0.76809	1.62835
	2.75608	0.323581				2.75563	0.767749	1.62763
	2.75968	0.323002				2.75923	0.76747	1.62704
	2.76328	0.322442				2.76283	0.76732	1.62672
	2.76688	0.322065				2.76643	0.767301	1.62668
	2.77048	0.321861				2.77003	0.767394	1.62688
	2.77408	0.321963				2.77363	0.767609	1.62733
	2.77768	0.322634				2.77723	0.767919	1.62799
	2.78128	0.32398				2.78083	0.768244	1.62868
	2.78488	0.325662				2.78443	0.768508	1.62924
	2.78848	0.32723				2.78803	0.768676	1.62959
	2.79208	0.328558				2.79163	0.768762	1.62978
	2.79568	0.329874				2.79523	0.768757	1.62976
	2.79928	0.331114				2.79883	0.768634	1.6295
	2.80288	0.332019				2.80243	0.768406	1.62902
	2.80648	0.332637				2.80603	0.768129	1.62843
	2.81008	0.333189				2.80963	0.767847	1.62784
	2.81368	0.333592				2.81323	0.767586	1.62728
	2.81728	0.333623				2.81683	0.767386	1.62686
	2.82088	0.333203				2.82043	0.7673	1.62668
	2.82448	0.332449				2.82403	0.767336	1.62675
	2.82808	0.331528				2.82763	0.76744	1.62697
	2.83168	0.330403				2.83123	0.767542	1.62719
	2.83528	0.328882				2.83483	0.767608	1.62733
	2.83888	0.326971				2.83843	0.767617	1.62735
	2.84248	0.324864				2.84203	0.767571	1.62725
	2.84608	0.322742				2.84563	0.767474	1.62704
	2.84968	0.320845				2.84923	0.767332	1.62674
	2.85328	0.319537				2.85283	0.767156	1.62637
	2.85688	0.319146				2.85643	0.766991	1.62602
	2.86048	0.319748				2.86003	0.766868	1.62576
	2.86408	0.321121				2.86363	0.766797	1.62561
	2.86769	0.322932				2.86724	0.766786	1.62559
	2.87129	0.324906				2.87084	0.76683	1.62568
	2.87489	0.327003				2.87444	0.7669	1.62583
	2.87849	0.329281				2.87804	0.766974	1.62598
	2.88209	0.331646				2.88164	0.767052	1.62615
	2.88569	0.333819				2.88524	0.76714	1.62634
	2.88929	0.335525				2.88884	0.767238	1.62654
	2.89289	0.336488				2.89244	0.767335	1.62675
	2.89649	0.336331				2.89604	0.767399	1.62689
	2.90009	0.334911				2.89964	0.767426	1.62694
	2.90369	0.332506				2.90324	0.767458	1.62701
	2.90729	0.329607				2.90684	0.767534	1.62717
	2.91089	0.32672				2.91044	0.767673	1.62747
	2.91449	0.324155				2.91404	0.767869	1.62788
	2.91809	0.321921				2.91764	0.768106	1.62838
	2.92169	0.319927				2.92124	0.768333	1.62887
	2.92529	0.318258				2.92484	0.768505	1.62923
	2.92889	0.316851				2.92844	0.768619	1.62947
	2.93249	0.315654				2.93204	0.768706	1.62966
	2.93609	0.31476				2.93564	0.768782	1.62982
	2.93969	0.314363				2.93924	0.768817	1.62989
	2.94329	0.314566				2.94284	0.7688	1.62986
	2.94689	0.315251				2.94644	0.768738	1.62972
	2.95049	0.316103				2.95004	0.768643	1.62952
	2.95409	0.316935				2.95364	0.768515	1.62925
	2.95769	0.317709				2.95724	0.768365	1.62893
	2.96129	0.318156				2.96084	0.768226	1.62864
	2.96489	0.318168				2.96444	0.7681	1.62837
	2.96849	0.317985				2.96804	0.767964	1.62808
	2.97209	0.317797				2.97164	0.767799	1.62773
	2.97569	0.317615				2.97524	0.76764	1.6274
	2.97929	0.317534				2.97884	0.767544	1.62719
	2.98289	0.317528				2.98244	0.767551	1.62721
	2.98649	0.317502				2.98604	0.767638	1.62739
	2.99009	0.317346				2.98964	0.767785	1.6277
	2.99369	0.317069				2.99324	0.76795	1.62805
	2.99729	0.316815				2.99684	0.768083	1.62834
	3.00089	0.316687				3.00044	0.76812	1.62841
	3.00449	0.316541				3.00404	0.768059	1.62829
	3.00809	0.316364				3.00764	0.767935	1.62802
	3.01169	0.316334				3.01124	0.767784	1.6277
	3.01529	0.316362				3.01484	0.767596	1.6273
	3.01889	0.316182				3.01844	0.76734	1.62676
	3.02249	0.31582				3.02204	0.767038	1.62612
	3.02609	0.315541				3.02564	0.766713	1.62543
	3.02969	0.315428				3.02924	0.76637	1.6247
	3.03329	0.31527				3.03284	0.766039	1.624
	3.03689	0.314872				3.03644	0.765793	1.62348
	3.04049	0.314242				3.04004	0.76566	1.6232
	3.04409	0.313417				3.04364	0.765628	1.62313
	3.04769	0.312265				3.04724	0.765682	1.62325
	3.05129	0.310706				3.05084	0.7658	1.6235
	3.05489	0.309106				3.05444	0.765942	1.6238
	3.05849	0.307992				3.05804	0.766056	1.62404
	3.06209	0.30766				3.06164	0.766137	1.62421
	3.06569	0.308047				3.06524	0.766228	1.6244
	3.06929	0.309081				3.06884	0.766359	1.62468
	3.07289	0.310638				3.07244	0.766516	1.62501
	3.07649	0.31238				3.07604	0.766685	1.62537
	3.08009	0.313895				3.07964	0.766833	1.62569
	3.08369	0.315083				3.08324	0.766885	1.6258
	3.08729	0.316214				3.08684	0.766783	1.62558
	3.09089	0.317249				3.09044	0.766565	1.62512
	3.09449	0.317976				3.09404	0.766341	1.62464
	3.09809	0.31823				3.09764	0.766189	1.62432
	3.10169	0.318088				3.10124	0.766127	1.62419
	3.10529	0.317423				3.10484	0.766165	1.62427
	3.10889	0.316381				3.10844	0.766299	1.62455
	3.11249	0.315387				3.11204	0.766476	1.62493
	3.11609	0.314868				3.11564	0.76664	1.62528
	3.11969	0.314925				3.11924	0.766805	1.62563
	3.12329	0.315293				3.12284	0.767013	1.62607
	3.12689	0.315674				3.12644	0.767256	1.62658
	3.13049	0.315919				3.13004	0.767468	1.62703
	3.13409	0.316051				3.13364	0.767589	1.62729
	3.13769	0.315985				3.13724	0.767588	1.62729
	3.14129	0.315906				3.14084	0.76745	1.62699
	3.14489	0.316061				3.14444	0.767182	1.62643
	3.14849	0.316528				3.14804	0.76683	1.62568
	3.15209	0.317078				3.15164	0.766466	1.62491
	3.15569	0.317555				3.15524	0.766168	1.62428
	3.15929	0.317981				3.15884	0.765982	1.62388
	3.16289	0.318508				3.16244	0.765894	1.6237
	3.16649	0.319159				3.16604	0.765886	1.62368
	3.17009	0.319829				3.16964	0.765967	1.62385
	3.17369	0.320306				3.17324	0.766127	1.62419
	3.17729	0.320543				3.17684	0.766313	1.62458
	3.18089	0.320631				3.18044	0.766474	1.62492
	3.18449	0.320571				3.18404	0.766585	1.62516
	3.18809	0.32021				3.18764	0.766649	1.6253
	3.19169	0.319696				3.19124	0.766665	1.62533
	3.19529	0.319262				3.19484	0.766622	1.62524
	3.19889	0.318911				3.19844	0.766547	1.62508
	3.20249	0.318522				3.20204	0.766499	1.62498
	3.20609	0.318219				3.20564	0.766497	1.62497
	3.20969	0.318141				3.20924	0.766518	1.62502
	3.21329	0.318284				3.21284	0.766579	1.62515
	3.21689	0.318447				3.21644	0.766694	1.62539
	3.22049	0.318578				3.22004	0.766831	1.62568
	3.22409	0.31885				3.22364	0.766949	1.62593
	3.22769	0.319505				3.22724	0.767026	1.6261
	3.23129	0.320296				3.23084	0.767027	1.6261
	3.23489	0.320793				3.23444	0.766945	1.62592
	3.23849	0.320955				3.23804	0.766822	1.62566
	3.24209	0.320997				3.24164	0.766679	1.62536
	3.24569	0.320883				3.24524	0.766511	1.625
	3.24929	0.320539				3.24884	0.766301	1.62456
	3.25289	0.32019				3.25244	0.766046	1.62402
	3.25649	0.320075				3.25604	0.765772	1.62344
	3.26009	0.319971				3.25964	0.765525	1.62291
	3.26369	0.31953				3.26324	0.765361	1.62257
	3.26729	0.318839				3.26684	0.765336	1.62251
	3.27089	0.318352				3.27044	0.765483	1.62282
	3.27449	0.318315				3.27404	0.765737	1.62336
	3.27809	0.318611				3.27764	0.76602	1.62396
	3.28169	0.319139				3.28124	0.766319	1.6246
	3.28529	0.320016				3.28484	0.766674	1.62535
	3.28889	0.321079				3.28844	0.767102	1.62626
	3.29249	0.321978				3.29204	0.767579	1.62727
	3.29609	0.322791				3.29564	0.768079	1.62833
	3.29969	0.32387				3.29924	0.768568	1.62936
	3.30329	0.325338				3.30284	0.768991	1.63026
	3.30689	0.327182				3.30644	0.76932	1.63096
	3.31049	0.329412				3.31004	0.769575	1.6315
	3.31409	0.331843				3.31364	0.769825	1.63203
	3.31769	0.334261				3.31724	0.770086	1.63258
	3.32129	0.33654				3.32084	0.770313	1.63306
	3.32489	0.338618				3.32444	0.770433	1.63332
	3.32849	0.340668				3.32804	0.770458	1.63337
	3.33209	0.342842				3.33164	0.770408	1.63326
	3.33569	0.344881				3.33524	0.770305	1.63305
	3.33929	0.346528				3.33884	0.770168	1.63276
	3.34289	0.347669				3.34244	0.770016	1.63243
	3.34649	0.348101				3.34604	0.769829	1.63204
	3.35009	0.347847				3.34964	0.769572	1.63149
	3.35369	0.347465				3.35324	0.769256	1.63082
	3.35729	0.347359				3.35684	0.768959	1.63019
	3.36089	0.347632				3.36044	0.768764	1.62978
	3.36449	0.348347				3.36404	0.768711	1.62967
	3.36809	0.349492				3.36764	0.768815	1.62989
	3.37169	0.351141				3.37124	0.769028	1.63034
	3.37529	0.35352				3.37484	0.769254	1.63082
	3.37889	0.356662				3.37844	0.769447	1.63123
	3.38249	0.360511				3.38204	0.769644	1.63165
	3.38609	0.365178				3.38564	0.769914	1.63222
	3.38969	0.370438				3.38924	0.770301	1.63304
	3.39329	0.37575				3.39284	0.770783	1.63406
	3.39689	0.381087				3.39644	0.771302	1.63516
	3.40049	0.386682				3.40004	0.771812	1.63624
	3.40409	0.392578				3.40364	0.772256	1.63718
	3.40769	0.39849				3.40724	0.772605	1.63792
	3.41129	0.404233				3.41084	0.772911	1.63857
	3.41489	0.409599				3.41444	0.773267	1.63933
	3.41849	0.414404				3.41804	0.773694	1.64023
	3.42209	0.418592				3.42164	0.774178	1.64126
	3.42569	0.422309				3.42524	0.774686	1.64233
	3.42929	0.425874				3.42884	0.77518	1.64338
	3.43289	0.429306				3.43244	0.775618	1.64431
	3.43649	0.432426				3.43604	0.77598	1.64508
	3.44009	0.435023				3.43964	0.776259	1.64567
	3.44369	0.437083				3.44324	0.776481	1.64614
	3.44729	0.438604				3.44684	0.776696	1.6466
	3.45089	0.439903				3.45044	0.776929	1.64709
	3.45449	0.441515				3.45404	0.777161	1.64758
	3.45809	0.443664				3.45764	0.77736	1.648
	3.46169	0.446197				3.46124	0.777497	1.64829
	3.46529	0.448853				3.46484	0.777578	1.64847
	3.46889	0.451571				3.46844	0.777642	1.6486
	3.47249	0.454262				3.47204	0.777758	1.64885
	3.47609	0.456921				3.47564	0.777974	1.6493
	3.47969	0.459486				3.47924	0.778341	1.65008
	3.48329	0.462215				3.48284	0.778829	1.65112
	3.48689	0.46521				3.48644	0.779375	1.65228
	3.49049	0.468387				3.49004	0.779933	1.65346
	3.49409	0.471548				3.49364	0.78048	1.65462
	3.49769	0.474787				3.49724	0.78099	1.6557
	3.50129	0.478035				3.50084	0.781442	1.65666
	3.50489	0.481119				3.50444	0.781825	1.65747
	3.50849	0.483977				3.50804	0.782145	1.65815
	3.51209	0.486423				3.51164	0.782419	1.65873
	3.51569	0.488268				3.51524	0.782636	1.65919
	3.51929	0.489515				3.51884	0.78283	1.6596
	3.52289	0.490284				3.52244	0.78309	1.66015
	3.52649	0.490501				3.52604	0.783444	1.6609
	3.53009	0.490187				3.52964	0.783842	1.66175
	3.53369	0.489634				3.53324	0.784261	1.66263
	3.53729	0.489004				3.53684	0.7847	1.66356
	3.54089	0.488454				3.54044	0.785138	1.66449
	3.54449	0.487905				3.54404	0.78553	1.66532
	3.54809	0.487489				3.54764	0.785872	1.66605
	3.55169	0.487285				3.55124	0.786195	1.66673
	3.55529	0.487404				3.55484	0.786542	1.66747
	3.55889	0.487661				3.55844	0.786855	1.66813
	3.56249	0.487814				3.56204	0.787103	1.66866
	3.56609	0.487783				3.56564	0.787319	1.66912
	3.56969	0.487514				3.56924	0.787558	1.66962
	3.57329	0.487086				3.57284	0.787815	1.67017
	3.57689	0.486585				3.57644	0.788087	1.67074
	3.58049	0.486071				3.58004	0.788411	1.67143
	3.58409	0.485571				3.58364	0.788813	1.67228
	3.58769	0.485005				3.58724	0.789277	1.67327
	3.59129	0.484221				3.59084	0.789757	1.67428
	3.59489	0.483187				3.59444	0.790264	1.67536
	3.59849	0.482315				3.59804	0.790786	1.67647
	3.60209	0.481906				3.60164	0.791293	1.67754
	3.60569	0.481924				3.60524	0.79179	1.67859
	3.60929	0.482123				3.60884	0.792315	1.67971
	3.61289	0.482376				3.61244	0.792853	1.68085
	3.61649	0.482772				3.61604	0.79337	1.68194
	3.62009	0.483509				3.61964	0.793874	1.68301
	3.62369	0.484752				3.62324	0.794389	1.6841
	3.62729	0.486554				3.62684	0.794912	1.68521
	3.63089	0.488719				3.63044	0.795419	1.68629
	3.63449	0.490706				3.63404	0.795933	1.68738
	3.63809	0.492044				3.63764	0.796466	1.68851
	3.64169	0.492798				3.64124	0.796927	1.68949
	3.64529	0.493437				3.64484	0.797224	1.69011
	3.64889	0.4943				3.64844	0.797379	1.69044
	3.65249	0.495543				3.65204	0.797475	1.69065
	3.65609	0.497039				3.65564	0.797566	1.69084
	3.65969	0.498629				3.65924	0.797731	1.69119
	3.66329	0.500256				3.66284	0.798017	1.6918
	3.66689	0.502136				3.66644	0.798421	1.69265
	3.67049	0.504578				3.67004	0.798904	1.69368
	3.67409	0.507824				3.67364	0.79945	1.69483
	3.67769	0.511968				3.67724	0.800045	1.6961
	3.68129	0.516741				3.68084	0.800721	1.69753
	3.68489	0.521991				3.68444	0.801525	1.69923
	3.68849	0.527644				3.68804	0.802494	1.70129
	3.69209	0.533903				3.69164	0.803605	1.70364
	3.69569	0.541178				3.69524	0.804756	1.70608
	3.69929	0.549792				3.69884	0.805844	1.70839
	3.70289	0.559655				3.70244	0.80687	1.71056
	3.70649	0.570638				3.70604	0.807868	1.71268
	3.71009	0.582951				3.70964	0.808837	1.71473
	3.71369	0.596834				3.71324	0.80984	1.71686
	3.71729	0.612675				3.71684	0.810998	1.71932
	3.72089	0.630777				3.72044	0.812309	1.7221
	3.72449	0.651584				3.72404	0.813654	1.72495
	3.72809	0.675473				3.72764	0.814981	1.72776
	3.73169	0.702284				3.73124	0.816312	1.73058
	3.73529	0.731371				3.73484	0.817671	1.73346
	3.73889	0.762872				3.73844	0.819064	1.73642
	3.74249	0.797617				3.74204	0.820534	1.73953
	3.74609	0.835999				3.74564	0.822121	1.7429
	3.74969	0.878283				3.74924	0.823825	1.74651
	3.75329	0.925101				3.75284	0.825588	1.75025
	3.75689	0.976748				3.75644	0.827382	1.75405
	3.76049	1.0329				3.76004	0.829269	1.75805
	3.76409	1.09311				3.76364	0.831331	1.76242
	3.76769	1.15748				3.76724	0.833589	1.76721
	3.77129	1.22643				3.77084	0.836042	1.77241
	3.77489	1.30018				3.77444	0.83869	1.77802
	3.77849	1.37838				3.77804	0.841495	1.78397
	3.78209	1.46073				3.78164	0.844435	1.7902
	3.78569	1.54689				3.78524	0.847541	1.79679
	3.78929	1.63611				3.78884	0.850872	1.80385
	3.79289	1.72744				3.79244	0.854445	1.81142
	3.79649	1.82038				3.79604	0.858255	1.8195
	3.80009	1.91451				3.79964	0.862273	1.82802
	3.80369	2.00897				3.80324	0.866477	1.83693
	3.80729	2.10277				3.80684	0.870869	1.84624
	3.81089	2.19552				3.81044	0.875505	1.85607
	3.81449	2.28732				3.81404	0.880466	1.86659
	3.81809	2.37827				3.81764	0.885759	1.87781
	3.82169	2.46809				3.82124	0.891311	1.88958
	3.82529	2.55661				3.82484	0.897071	1.90179
	3.82889	2.64356				3.82844	0.903108	1.91459
	3.83249	2.72845				3.83204	0.909492	1.92812
	3.83609	2.81079				3.83564	0.916272	1.9425
	3.83969	2.89044				3.83924	0.923522	1.95787
	3.84329	2.96763				3.84284	0.931322	1.9744
	3.84689	3.04226				3.84644	0.939653	1.99206
	3.85049	3.11408				3.85004	0.94844	2.01069
	3.85409	3.18239				3.85364	0.957688	2.0303
	3.85769	3.24678				3.85724	0.967464	2.05102
	3.86129	3.30723				3.86084	0.97782	2.07298
	3.86489	3.36402				3.86444	0.988757	2.09616
	3.86849	3.41718				3.86804	1.00025	2.12054
	3.87209	3.467				3.87164	1.01225	2.14597
	3.87569	3.51385				3.87524	1.02465	2.17225
	3.87929	3.55768				3.87884	1.03737	2.19923
	3.88289	3.59836				3.88244	1.05041	2.22686
	3.88649	3.63579				3.88604	1.06378	2.25521
	3.89009	3.66995				3.88964	1.07751	2.28433
	3.89369	3.70083				3.89324	1.09163	2.31425
	3.89729	3.72865				3.89684	1.10614	2.34501
	3.90089	3.75348				3.90044	1.12099	2.3765
	3.90449	3.77546				3.90404	1.13605	2.40843
	3.90809	3.79468				3.90764	1.15127	2.44068
	3.91169	3.81108				3.91124	1.16666	2.47331
	3.91529	3.8246				3.91484	1.18219	2.50624
	3.91889	3.83521				3.91844	1.19786	2.53947
	3.92249	3.84304				3.92204	1.21375	2.57315
	3.92609	3.84816				3.92564	1.22985	2.60728
	3.92969	3.85073				3.92924	1.24607	2.64167
	3.93329	3.85085				3.93284	1.26235	2.67619
	3.93689	3.84866				3.93644	1.27861	2.71066
	3.94049	3.84425				3.94004	1.29478	2.74494
	3.94409	3.83796				3.94364	1.31085	2.779
	3.94769	3.83014				3.94724	1.32684	2.8129
	3.95129	3.82106				3.95084	1.34277	2.84667
	3.95489	3.81114				3.95444	1.35861	2.88024
	3.95849	3.80061				3.95804	1.37425	2.9134
	3.96209	3.78951				3.96164	1.38958	2.94591
	3.96569	3.77794				3.96524	1.40454	2.97762
	3.96929	3.76604				3.96884	1.41904	3.00835
	3.97289	3.7536				3.97244	1.43306	3.03808
	3.97649	3.7402				3.97604	1.4467	3.067
	3.98009	3.72568				3.97964	1.46003	3.09526
	3.98369	3.71007				3.98324	1.47297	3.12269
	3.98729	3.69371				3.98684	1.48544	3.14914
	3.99089	3.67696				3.99044	1.49748	3.17466
	3.99449	3.66025				3.99404	1.5091	3.1993
	3.99809	3.64389				3.99764	1.52031	3.22306
	4.00169	3.62791				4.00124	1.53118	3.2461
	4.00529	3.61204				4.00484	1.54181	3.26864
	4.00889	3.59622				4.00844	1.55219	3.29065
	4.01249	3.58086				4.01204	1.56227	3.31201
	4.01609	3.5665				4.01564	1.57201	3.33267
	4.01969	3.5536				4.01924	1.58147	3.35272
	4.02329	3.54226				4.02284	1.59072	3.37232
	4.02689	3.53225				4.02644	1.5998	3.39157
	4.03049	3.52324				4.03004	1.60873	3.41051
	4.03409	3.51509				4.03364	1.61754	3.42918
	4.03769	3.50797				4.03724	1.62618	3.4475
	4.04129	3.50262				4.04084	1.6346	3.46535
	4.04489	3.49964				4.04444	1.64285	3.48283
	4.04849	3.499				4.04804	1.65101	3.50014
	4.05209	3.5004				4.05164	1.65916	3.51741
	4.05569	3.50345				4.05524	1.66734	3.53476
	4.05929	3.50752				4.05884	1.67557	3.5522
	4.06289	3.51215				4.06244	1.68382	3.56969
	4.06649	3.51742				4.06604	1.69204	3.58712
	4.07009	3.52374				4.06964	1.70026	3.60455
	4.07369	3.53104				4.07324	1.7085	3.62201
	4.07729	3.53902				4.07684	1.71679	3.63958
	4.08089	3.54757				4.08044	1.7252	3.65741
	4.08449	3.55684				4.08404	1.73386	3.67578
	4.08809	3.56679				4.08764	1.74281	3.69476
	4.09169	3.57735				4.09124	1.75201	3.71427
	4.09529	3.5888				4.09484	1.76144	3.73426
	4.09889	3.60169				4.09844	1.77107	3.75466
	4.10249	3.61632				4.10204	1.78081	3.77532
	4.10609	3.63248				4.10564	1.7906	3.79607
	4.10969	3.64999				4.10924	1.80046	3.81697
	4.11329	3.66881				4.11284	1.81045	3.83816
	4.11689	3.68897				4.11644	1.82065	3.85978
	4.12049	3.71013				4.12004	1.83102	3.88176
	4.12409	3.73207				4.12364	1.84157	3.90413
	4.12769	3.75487				4.12724	1.85238	3.92704
	4.13129	3.77859				4.13084	1.86341	3.95042
	4.13489	3.80265				4.13444	1.87465	3.97425
	4.13849	3.826				4.13804	1.88616	3.99867
	4.14209	3.84792				4.14164	1.89801	4.02378
	4.14569	3.86831				4.14524	1.91013	4.04947
	4.14929	3.88729				4.14884	1.92248	4.07565
	4.15289	3.90495				4.15244	1.93507	4.10235
	4.15649	3.92156				4.15604	1.94793	4.12962
	4.16009	3.93754				4.15964	1.96101	4.15734
	4.16369	3.95316				4.16324	1.97426	4.18543
	4.16729	3.96813				4.16684	1.98772	4.21397
	4.17089	3.98201				4.17044	2.00149	4.24317
	4.17449	3.9949				4.17404	2.01558	4.27304
	4.17809	4.00746				4.17764	2.03003	4.30366
	4.18169	4.02019				4.18124	2.045	4.3354
	4.18529	4.03324				4.18484	2.06062	4.36851
	4.18889	4.0465				4.18844	2.07676	4.40272
	4.19249	4.05973				4.19204	2.09324	4.43767
	4.19609	4.07269				4.19564	2.11005	4.4733
	4.19969	4.08496				4.19924	2.12727	4.50982
	4.20329	4.09605				4.20284	2.14492	4.54723
	4.20689	4.1059				4.20644	2.16297	4.5855
	4.21049	4.11505				4.21004	2.18149	4.62477
	4.21409	4.12374				4.21364	2.20052	4.66509
	4.21769	4.13176				4.21724	2.21989	4.70617
	4.22129	4.13916				4.22084	2.23948	4.7477
	4.22489	4.14618				4.22444	2.2594	4.78992
	4.22849	4.1526				4.22804	2.27985	4.83328
	4.23209	4.1579				4.23164	2.30098	4.87808
	4.23569	4.16186				4.23524	2.32281	4.92437
	4.23929	4.16461				4.23884	2.34536	4.97216
	4.24289	4.16643				4.24244	2.36859	5.02141
	4.24649	4.16742				4.24604	2.39237	5.07182
	4.25009	4.1677				4.24964	2.41655	5.12309
	4.25369	4.16747				4.25324	2.44115	5.17523
	4.25729	4.16656				4.25684	2.46613	5.22819
	4.26089	4.16494				4.26044	2.49139	5.28175
	4.26449	4.16275				4.26404	2.51693	5.33589
	4.26809	4.16028				4.26764	2.54284	5.39081
	4.27169	4.15755				4.27124	2.56913	5.44656
	4.27529	4.15458				4.27484	2.59582	5.50314
	4.27889	4.15126				4.27844	2.62297	5.56069
	4.28249	4.14778				4.28204	2.65059	5.61926
	4.28609	4.14454				4.28564	2.67865	5.67874
	4.28969	4.14197				4.28924	2.70712	5.73909
	4.29329	4.1402				4.29284	2.73606	5.80044
	4.29689	4.13912				4.29644	2.76567	5.86323
	4.30049	4.13833				4.30004	2.79611	5.92776
	4.30409	4.1376				4.30364	2.82732	5.99392
	4.30769	4.13676				4.30724	2.85911	6.06132
	4.31129	4.13567				4.31084	2.89128	6.12952
	4.31489	4.13443				4.31444	2.92363	6.19809
	4.31849	4.13335				4.31804	2.95605	6.26682
	4.32209	4.13219				4.32164	2.98861	6.33584
	4.32569	4.13055				4.32524	3.02145	6.40547
	4.32929	4.12841				4.32884	3.05464	6.47584
	4.33289	4.12593				4.33244	3.08807	6.54671
	4.33649	4.12307				4.33604	3.12145	6.61746
	4.34009	4.11995				4.33964	3.15454	6.68763
	4.34369	4.11702				4.34324	3.18727	6.75701
	4.34729	4.11474				4.34684	3.21967	6.8257
	4.35089	4.11318				4.35044	3.25187	6.89396
	4.35449	4.11227				4.35404	3.28401	6.96209
	4.35809	4.11213				4.35764	3.31615	7.03024
	4.36169	4.11303				4.36124	3.34826	7.09831
	4.36529	4.11492				4.36484	3.38029	7.16622
	4.36889	4.11775				4.36844	3.41224	7.23396
	4.37249	4.12137				4.37204	3.4442	7.3017
	4.37609	4.12566				4.37564	3.47625	7.36965
	4.37969	4.1303				4.37924	3.50842	7.43785
	4.38329	4.13527				4.38284	3.54068	7.50624
	4.38689	4.14113				4.38644	3.57297	7.5747
	4.39049	4.14871				4.39004	3.60527	7.64318
	4.39409	4.15805				4.39364	3.63755	7.71161
	4.39769	4.16864				4.39724	3.66972	7.7798
	4.40129	4.18004				4.40084	3.70162	7.84744
	4.40489	4.19191				4.40444	3.73308	7.91413
	4.40849	4.20413				4.40804	3.76388	7.97942
	4.41209	4.21711				4.41164	3.79382	8.04289
	4.41569	4.23169				4.41524	3.8228	8.10433
	4.41929	4.24832				4.41884	3.85078	8.16365
	4.42289	4.26657				4.42244	3.87778	8.2209
	4.42649	4.2855				4.42604	3.90386	8.27618
	4.4301	4.30453				4.42965	3.92895	8.32937
	4.4337	4.32383				4.43325	3.95305	8.38046
	4.4373	4.34364				4.43685	3.97634	8.42985
	4.4409	4.36442				4.44045	3.99903	8.47793
	4.4445	4.38702				4.44405	4.02115	8.52484
	4.4481	4.41213				4.44765	4.04281	8.57075
	4.4517	4.43971				4.45125	4.06406	8.61581
	4.4553	4.46959				4.45485	4.08479	8.65976
	4.4589	4.50176				4.45845	4.1049	8.70238
	4.4625	4.53642				4.46205	4.12426	8.74342
	4.4661	4.57374				4.46565	4.14279	8.78271
	4.4697	4.61364				4.46925	4.16047	8.82019
	4.4733	4.65601				4.47285	4.17729	8.85584
	4.4769	4.70095				4.47645	4.19312	8.88941
	4.4805	4.74844				4.48005	4.20798	8.92092
	4.4841	4.79825				4.48365	4.22201	8.95066
	4.4877	4.8501				4.48725	4.23523	8.97869
	4.4913	4.90385				4.49085	4.24777	9.00526
	4.4949	4.95936				4.49445	4.25993	9.03106
	4.4985	5.01664				4.49805	4.27194	9.0565
	4.5021	5.07583				4.50165	4.28366	9.08136
	4.5057	5.13739				4.50525	4.29494	9.10527
	4.5093	5.2019				4.50885	4.30575	9.1282
	4.5129	5.26957				4.51245	4.31614	9.15023
	4.5165	5.34003				4.51605	4.3261	9.17133
	4.5201	5.41314				4.51965	4.33556	9.19139
	4.5237	5.48873				4.52325	4.34456	9.21046
	4.5273	5.56681				4.52685	4.35311	9.2286
	4.5309	5.64773				4.53045	4.36104	9.2454
	4.5345	5.73238				4.53405	4.36813	9.26044
	4.5381	5.82115				4.53765	4.37459	9.27412
	4.5417	5.91411				4.54125	4.38081	9.28732
	4.5453	6.0115				4.54485	4.38699	9.30042
	4.5489	6.11392				4.54845	4.39305	9.31327
	4.5525	6.22186				4.55205	4.39902	9.32592
	4.5561	6.3354				4.55565	4.40503	9.33866
	4.5597	6.45484				4.55925	4.41111	9.35156
	4.5633	6.58059				4.56285	4.41717	9.36439
	4.5669	6.7127				4.56645	4.42337	9.37755
	4.5705	6.85094				4.57005	4.43004	9.39169
	4.5741	6.99561				4.57365	4.43721	9.40688
	4.5777	7.14741				4.57725	4.44462	9.42259
	4.5813	7.30651				4.58085	4.45221	9.43868
	4.5849	7.47235				4.58445	4.46014	9.45551
	4.5885	7.64456				4.58805	4.46843	9.47307
	4.5921	7.82337				4.59165	4.47698	9.4912
	4.5957	8.00887				4.59525	4.48591	9.51013
	4.5993	8.20098				4.59885	4.49552	9.5305
	4.6029	8.40002				4.60245	4.5059	9.55251
	4.6065	8.60644				4.60605	4.5169	9.57583
	4.6101	8.82018				4.60965	4.52839	9.6002
	4.6137	9.04082				4.61325	4.54045	9.62575
	4.6173	9.26845				4.61685	4.55319	9.65277
	4.6209	9.50343				4.62045	4.56679	9.6816
	4.6245	9.74636				4.62405	4.58143	9.71262
	4.6281	9.99804				4.62765	4.59732	9.74632
	4.6317	10.2596				4.63125	4.61461	9.78298
	4.6353	10.5319				4.63485	4.63323	9.82244
	4.6389	10.8152				4.63845	4.65299	9.86435
	4.6425	11.1099				4.64205	4.67392	9.90871
	4.6461	11.417				4.64565	4.69618	9.9559
	4.6497	11.7373				4.64925	4.72003	10.0065
	4.6533	12.0712				4.65285	4.74564	10.0607
	4.6569	12.4193				4.65645	4.77299	10.1187
	4.6605	12.7819				4.66005	4.80201	10.1803
	4.6641	13.1582				4.66365	4.83272	10.2454
	4.6677	13.5474				4.66725	4.86524	10.3143
	4.6713	13.9493				4.67085	4.89976	10.3875
	4.6749	14.3645				4.67445	4.93644	10.4653
	4.6785	14.7926				4.67805	4.97557	10.5482
	4.6821	15.2331				4.68165	5.01726	10.6366
	4.6857	15.6856				4.68525	5.06141	10.7302
	4.6893	16.1494				4.68885	5.10783	10.8286
	4.6929	16.6241				4.69245	5.15646	10.9317
	4.6965	17.1091				4.69605	5.20736	11.0396
	4.7001	17.6052				4.69965	5.2608	11.1529
	4.7037	18.1128				4.70325	5.31693	11.2719
	4.7073	18.6325				4.70685	5.37573	11.3965
	4.7109	19.1648				4.71045	5.43713	11.5267
	4.7145	19.7109				4.71405	5.50124	11.6626
	4.7181	20.2716				4.71765	5.56796	11.8041
	4.7217	20.8473				4.72125	5.63742	11.9513
	4.7253	21.439				4.72485	5.70999	12.1052
	4.7289	22.0476				4.72845	5.78622	12.2668
	4.7325	22.6731				4.73205	5.86633	12.4366
	4.7361	23.3154				4.73565	5.95021	12.6144
	4.7397	23.9748				4.73925	6.03774	12.8
	4.7433	24.6516				4.74285	6.12914	12.9938
	4.7469	25.3454				4.74645	6.22463	13.1962
	4.7505	26.0549				4.75005	6.32427	13.4074
	4.7541	26.7784				4.75365	6.42831	13.628
	4.7577	27.5148				4.75725	6.53725	13.859
	4.7613	28.2629				4.76085	6.65126	14.1007
	4.7649	29.0218				4.76445	6.77016	14.3527
	4.7685	29.7906				4.76805	6.89403	14.6153
	4.7721	30.5694				4.77165	7.02319	14.8892
	4.7757	31.3579				4.77525	7.15785	15.1746
	4.7793	32.1541				4.77885	7.29789	15.4715
	4.7829	32.9563				4.78245	7.44323	15.7797
	4.7865	33.7633				4.78605	7.59397	16.0992
	4.7901	34.5746				4.78965	7.75008	16.4302
	4.7937	35.3901				4.79325	7.91133	16.772
	4.7973	36.21				4.79685	8.07741	17.1241
	4.8009	37.0342				4.80045	8.24837	17.4865
	4.8045	37.8631				4.80405	8.42458	17.8601
	4.8081	38.6968				4.80765	8.60613	18.245
	4.8117	39.535				4.81125	8.79296	18.6411
	4.8153	40.3773				4.81485	8.98522	19.0487
	4.8189	41.224				4.81845	9.18345	19.4689
	4.8225	42.0749				4.82205	9.38762	19.9018
	4.8261	42.93				4.82565	9.59759	20.3469
	4.8297	43.7899				4.82925	9.81377	20.8052
	4.8333	44.6542				4.83285	10.0369	21.2783
	4.8369	45.5225				4.83645	10.2673	21.7667
	4.8405	46.3929				4.84005	10.5049	22.2704
	4.8441	47.2616				4.84365	10.7498	22.7896
	4.8477	48.1242				4.84725	11.0025	23.3253
	4.8513	48.978				4.85085	11.2633	23.8783
	4.8549	49.8216				4.85445	11.532	24.4478
	4.8585	50.6551				4.85805	11.8079	25.0327
	4.8621	51.4785				4.86165	12.0911	25.6331
	4.8657	52.2902				4.86525	12.3809	26.2476
	4.8693	53.0869				4.86885	12.6765	26.8742
	4.8729	53.8663				4.87245	12.9772	27.5116
	4.8765	54.6256				4.87605	13.2827	28.1593
	4.8801	55.3625				4.87965	13.5929	28.8169
	4.8837	56.0776				4.88325	13.9075	29.4838
	4.8873	56.7732				4.88685	14.2258	30.1587
	4.8909	57.4506				4.89045	14.5472	30.8401
	4.8945	58.1095				4.89405	14.8717	31.5281
	4.8981	58.7484				4.89765	15.1996	32.2233
	4.9017	59.3676				4.90125	15.5313	32.9264
	4.9053	59.9692				4.90485	15.8673	33.6387
	4.9089	60.5536				4.90845	16.2083	34.3617
	4.9125	61.1207				4.91205	16.5548	35.0961
	4.9161	61.6724				4.91565	16.9062	35.8411
	4.9197	62.2109				4.91925	17.2617	36.5948
	4.9233	62.7343				4.92285	17.6213	37.3571
	4.9269	63.2399				4.92645	17.9851	38.1284
	4.9305	63.7262				4.93005	18.3531	38.9085
	4.9341	64.1911				4.93365	18.7254	39.6979
	4.9377	64.6322				4.93725	19.1021	40.4964
	4.9413	65.0468				4.94085	19.4824	41.3028
	4.9449	65.4321				4.94445	19.8653	42.1144
	4.9485	65.7863				4.94805	20.2492	42.9284
	4.9521	66.1091				4.95165	20.6332	43.7423
	4.9557	66.4001				4.95525	21.0163	44.5545
	4.9593	66.6596				4.95885	21.3977	45.3631
	4.9629	66.8887				4.96245	21.7772	46.1677
	4.9665	67.0877				4.96605	22.1548	46.9682
	4.9701	67.2572				4.96965	22.5297	47.763
	4.9737	67.3983				4.97325	22.9007	48.5495
	4.9773	67.5116				4.97685	23.2667	49.3254
	4.9809	67.5971				4.98045	23.6268	50.0888
	4.9845	67.6566				4.98405	23.9804	50.8385
	4.9881	67.6923				4.98765	24.328	51.5754
	4.9917	67.7042				4.99125	24.6708	52.3021
	4.9953	67.6911				4.99485	25.01	53.0212
	4.9989	67.6522				4.99845	25.3466	53.7347
	5.0025	67.5876				5.00205	25.6801	54.4419
	5.0061	67.4974				5.00565	26.0097	55.1406
	5.0097	67.3811				5.00925	26.3346	55.8293
	5.0133	67.239				5.01285	26.6548	56.5083
	5.0169	67.0736				5.01645	26.9702	57.1767
	5.0205	66.8859				5.02005	27.28	57.8336
	5.0241	66.6761				5.02365	27.5844	58.4789
	5.0277	66.4433				5.02725	27.8829	59.1118
	5.0313	66.1874				5.03085	28.1747	59.7303
	5.0349	65.9081				5.03445	28.4579	60.3307
	5.0385	65.6054				5.03805	28.7318	60.9115
	5.0421	65.2797				5.04165	28.9968	61.4732
	5.0457	64.932				5.04525	29.2531	62.0166
	5.0493	64.5631				5.04885	29.5002	62.5405
	5.0529	64.1718				5.05245	29.7376	63.0436
	5.0565	63.7567				5.05605	29.9651	63.5259
	5.0601	63.3165				5.05965	30.1821	63.986
	5.0637	62.8503				5.06325	30.3872	64.4208
	5.0673	62.3589				5.06685	30.579	64.8275
	5.0709	61.8446				5.07045	30.757	65.2048
	5.0745	61.3092				5.07405	30.9207	65.5518
	5.0781	60.7538				5.07765	31.0698	65.868
	5.0817	60.1805				5.08125	31.2046	66.1538
	5.0853	59.5917				5.08485	31.326	66.4112
	5.0889	58.9895				5.08845	31.4357	66.6437
	5.0925	58.3762				5.09205	31.5351	66.8545
	5.0961	57.7542				5.09565	31.6248	67.0446
	5.0997	57.1241				5.09925	31.7051	67.2148
	5.1033	56.486				5.10285	31.7756	67.3642
	5.1069	55.84				5.10645	31.8355	67.4912
	5.1105	55.1866				5.11005	31.8842	67.5946
	5.1141	54.5262				5.11365	31.922	67.6746
	5.1177	53.8592				5.11725	31.9483	67.7303
	5.1213	53.1861				5.12085	31.963	67.7616
	5.1249	52.5062				5.12445	31.966	67.7679
	5.1285	51.8183				5.12805	31.9569	67.7486
	5.1321	51.1219				5.13165	31.9357	67.7036
	5.1357	50.4179				5.13525	31.9025	67.6334
	5.1393	49.7074				5.13885	31.8572	67.5372
	5.1429	48.9908				5.14245	31.8007	67.4175
	5.1465	48.2702				5.14605	31.7339	67.2758
	5.1501	47.5485				5.14965	31.6574	67.1137
	5.1537	46.8263				5.15325	31.5718	66.9322
	5.1573	46.1019				5.15685	31.4775	66.7322
	5.1609	45.3749				5.16045	31.3731	66.5109
	5.1645	44.6461				5.16405	31.2573	66.2654
	5.1681	43.9149				5.16765	31.1294	65.9944
	5.1717	43.1808				5.17125	30.9896	65.6979
	5.1753	42.446				5.17485	30.8389	65.3784
	5.1789	41.7137				5.17845	30.6793	65.0402
	5.1825	40.9853				5.18205	30.5126	64.6868
	5.1861	40.2605				5.18565	30.3391	64.319
	5.1897	39.5402				5.18925	30.1579	63.9348
	5.1933	38.8265				5.19285	29.9687	63.5336
	5.1969	38.1199				5.19645	29.7717	63.116
	5.2005	37.4188				5.20005	29.5676	62.6832
	5.2041	36.7236				5.20365	29.3562	62.2352
	5.2077	36.0353				5.20725	29.138	61.7725
	5.2113	35.3543				5.21085	28.9128	61.2951
	5.2149	34.6803				5.21445	28.68	60.8016
	5.2185	34.0134				5.21805	28.4398	60.2923
	5.2221	33.3533				5.22165	28.1929	59.769
	5.2257	32.6992				5.22525	27.9404	59.2337
	5.2293	32.0505				5.22885	27.6827	58.6874
	5.2329	31.4076				5.23245	27.4205	58.1314
	5.2365	30.772				5.23605	27.1543	57.5672
	5.2401	30.1456				5.23965	26.8837	56.9934
	5.2437	29.5293				5.24325	26.608	56.4089
	5.2473	28.9232				5.24685	26.3282	55.8157
	5.2509	28.3272				5.25045	26.0456	55.2166
	5.2545	27.7415				5.25405	25.7597	54.6106
	5.2581	27.1657				5.25765	25.4704	53.9973
	5.2617	26.6				5.26125	25.1786	53.3785
	5.2653	26.0441				5.26485	24.8846	52.7555
	5.2689	25.4977				5.26845	24.5875	52.1255
	5.2725	24.96				5.27205	24.2862	51.4867
	5.2761	24.4311				5.27565	23.9816	50.841
	5.2797	23.9114				5.27925	23.6754	50.1919
	5.2833	23.402				5.28285	23.3687	49.5417
	5.2869	22.9033				5.28645	23.0622	48.8918
	5.2905	22.4147				5.29005	22.7567	48.2442
	5.2941	21.9352				5.29365	22.4527	47.5998
	5.2977	21.4646				5.29725	22.1492	46.9563
	5.3013	21.0033				5.30085	21.8453	46.312
	5.3049	20.5511				5.30445	21.5415	45.6681
	5.3085	20.1086				5.30805	21.2386	45.0259
	5.3121	19.6767				5.31165	20.9373	44.3871
	5.3157	19.2555				5.31525	20.6386	43.7538
	5.3193	18.8443				5.31885	20.3423	43.1257
	5.3229	18.4422				5.32245	20.047	42.4997
	5.3265	18.0487				5.32605	19.7514	41.873
	5.3301	17.6651				5.32965	19.4554	41.2454
	5.3337	17.2917				5.33325	19.1592	40.6175
	5.3373	16.9278				5.33685	18.8632	39.9899
	5.3409	16.5725				5.34045	18.5679	39.3639
	5.3445	16.2259				5.34405	18.2744	38.7417
	5.3481	15.888				5.34765	17.9835	38.125
	5.3517	15.5583				5.35125	17.695	37.5134
	5.3553	15.2368				5.35485	17.4088	36.9068
	5.3589	14.9245				5.35845	17.1257	36.3064
	5.3625	14.6215				5.36205	16.8464	35.7144
	5.3661	14.3272				5.36565	16.5712	35.1309
	5.3697	14.0402				5.36925	16.2993	34.5545
	5.3733	13.7602				5.37285	16.0301	33.9838
	5.3769	13.4875				5.37645	15.7639	33.4194
	5.3805	13.2222				5.38005	15.5008	32.8618
	5.3841	12.9636				5.38365	15.2407	32.3103
	5.3877	12.7115				5.38725	14.9835	31.765
	5.3913	12.4659				5.39085	14.7297	31.227
	5.3949	12.2271				5.39445	14.4793	30.696
	5.3985	11.995				5.39805	14.2318	30.1714
	5.4021	11.7695				5.40165	13.9872	29.6529
	5.4057	11.551				5.40525	13.7458	29.141
	5.4093	11.3398				5.40885	13.5082	28.6373
	5.4129	11.1356				5.41245	13.2752	28.1434
	5.4165	10.9378				5.41605	13.0469	27.6594
	5.4201	10.7465				5.41965	12.8228	27.1844
	5.4237	10.5613				5.42325	12.6024	26.7171
	5.4273	10.3813				5.42685	12.3851	26.2564
	5.4309	10.2059				5.43045	12.1705	25.8015
	5.4345	10.035				5.43405	11.9584	25.3518
	5.4381	9.86869				5.43765	11.749	24.9078
	5.4417	9.70718				5.44125	11.5428	24.4708
	5.4453	9.5503				5.44485	11.3405	24.0419
	5.4489	9.39779				5.44845	11.1415	23.62
	5.4525	9.24977				5.45205	10.9452	23.2039
	5.4561	9.10595				5.45565	10.7517	22.7937
	5.4597	8.966				5.45925	10.5612	22.3898
	5.4633	8.83025				5.46285	10.3737	21.9922
	5.4669	8.6989				5.46645	10.1894	21.6016
	5.4705	8.57149				5.47005	10.0091	21.2192
	5.4741	8.44781				5.47365	9.8331	20.8462
	5.4777	8.32783				5.47725	9.6615	20.4824
	5.4813	8.21159				5.48085	9.49373	20.1267
	5.4849	8.09916				5.48445	9.32941	19.7783
	5.4885	7.99054				5.48805	9.16837	19.4369
	5.4921	7.8853				5.49165	9.0104	19.102
	5.4957	7.78328				5.49525	8.85561	18.7739
	5.4993	7.68414				5.49885	8.70444	18.4534
	5.5029	7.5874				5.50245	8.55712	18.1411
	5.5065	7.49285				5.50605	8.41342	17.8364
	5.5101	7.40059				5.50965	8.27282	17.5384
	5.5137	7.31063				5.51325	8.13457	17.2453
	5.5173	7.22286				5.51685	7.99812	16.956
	5.5209	7.13727				5.52045	7.86341	16.6704
	5.5245	7.05387				5.52405	7.73071	16.3891
	5.5281	6.97283				5.52765	7.60032	16.1127
	5.5317	6.89422				5.53125	7.47243	15.8415
	5.5353	6.81802				5.53485	7.34701	15.5757
	5.5389	6.74434				5.53845	7.22408	15.315
	5.5425	6.67309				5.54205	7.10369	15.0598
	5.5461	6.60408				5.54565	6.98584	14.81
	5.5497	6.53723				5.54925	6.87051	14.5655
	5.5533	6.47271				5.55285	6.75783	14.3266
	5.5569	6.41057				5.55645	6.64791	14.0936
	5.5605	6.35075				5.56005	6.5409	13.8667
	5.5641	6.29287				5.56365	6.43689	13.6462
	5.5677	6.23642				5.56725	6.33583	13.432
	5.5713	6.18127				5.57085	6.23752	13.2235
	5.5749	6.12722				5.57445	6.1416	13.0202
	5.5785	6.07413				5.57805	6.04762	12.821
	5.5821	6.02225				5.58165	5.95531	12.6253
	5.5857	5.97205				5.58525	5.86477	12.4333
	5.5893	5.92309				5.58885	5.77618	12.2455
	5.5929	5.87475				5.59245	5.68966	12.0621
	5.5965	5.82686				5.59605	5.60527	11.8832
	5.6001	5.77928				5.59965	5.52267	11.7081
	5.6037	5.73216				5.60325	5.44147	11.5359
	5.6073	5.68603				5.60685	5.36167	11.3667
	5.6109	5.64152				5.61045	5.28351	11.201
	5.6145	5.59909				5.61405	5.20721	11.0393
	5.6181	5.55884				5.61765	5.13292	10.8818
	5.6217	5.52016				5.62125	5.06078	10.7289
	5.6253	5.48261				5.62485	4.99076	10.5804
	5.6289	5.44599				5.62845	4.92268	10.4361
	5.6325	5.40993				5.63205	4.85627	10.2953
	5.6361	5.37455				5.63565	4.79136	10.1577
	5.6397	5.34032				5.63925	4.72793	10.0232
	5.6433	5.30716				5.64285	4.66597	9.89185
	5.6469	5.2744				5.64645	4.60527	9.76318
	5.6505	5.24185				5.65005	4.54563	9.63673
	5.6541	5.20935				5.65365	4.48713	9.51272
	5.6577	5.1769				5.65725	4.43005	9.39171
	5.6613	5.14478				5.66085	4.37443	9.27379
	5.6649	5.11331				5.66445	4.32012	9.15865
	5.6685	5.08278				5.66805	4.26711	9.04626
	5.6721	5.05343				5.67165	4.2153	8.93644
	5.6757	5.02519				5.67525	4.16456	8.82887
	5.6793	4.99789				5.67885	4.11484	8.72346
	5.6829	4.97181				5.68245	4.06637	8.62071
	5.6865	4.94682				5.68605	4.01943	8.52119
	5.6901	4.92249				5.68965	3.97405	8.42498
	5.6937	4.89866				5.69325	3.92989	8.33136
	5.6973	4.87554				5.69685	3.88667	8.23975
	5.7009	4.85335				5.70045	3.84422	8.14974
	5.7045	4.83223				5.70405	3.80237	8.06102
	5.7081	4.81179				5.70765	3.76112	7.97357
	5.7117	4.79135				5.71125	3.72078	7.88805
	5.7153	4.77047				5.71485	3.68155	7.8049
	5.7189	4.74878				5.71845	3.64332	7.72384
	5.7225	4.72628				5.72205	3.60588	7.64447
	5.7261	4.70373				5.72565	3.56918	7.56666
	5.7297	4.6821				5.72925	3.5332	7.49039
	5.7333	4.66147				5.73285	3.49797	7.41571
	5.7369	4.64123				5.73645	3.4636	7.34284
	5.7405	4.62084				5.74005	3.43025	7.27213
	5.7441	4.60051				5.74365	3.39796	7.20368
	5.7477	4.58083				5.74725	3.36666	7.13731
	5.7513	4.56224				5.75085	3.33618	7.07271
	5.7549	4.54507				5.75445	3.3065	7.00978
	5.7585	4.52944				5.75805	3.27754	6.94838
	5.7621	4.51493				5.76165	3.24928	6.88847
	5.7657	4.50067				5.76525	3.22169	6.82999
	5.7693	4.48628				5.76885	3.19478	6.77294
	5.7729	4.47193				5.77245	3.16846	6.71713
	5.7765	4.45816				5.77605	3.14268	6.66248
	5.7801	4.44522				5.77965	3.1174	6.60888
	5.7837	4.43299				5.78325	3.0925	6.5561
	5.7873	4.42119				5.78685	3.06784	6.50383
	5.7909	4.4097				5.79045	3.04345	6.45211
	5.7945	4.39856				5.79405	3.01945	6.40123
	5.7981	4.38783				5.79765	2.99594	6.35139
	5.8017	4.37743				5.80125	2.97295	6.30265
	5.8053	4.36726				5.80485	2.95051	6.25509
	5.8089	4.35747				5.80845	2.9286	6.20864
	5.8125	4.34818				5.81205	2.90707	6.16299
	5.8161	4.33943				5.81565	2.88585	6.118
	5.8197	4.33119				5.81925	2.86504	6.07388
	5.8233	4.32383				5.82285	2.84481	6.031
	5.8269	4.31758				5.82645	2.82521	5.98945
	5.8305	4.31222				5.83005	2.8062	5.94915
	5.8341	4.30737				5.83365	2.78771	5.90995
	5.8377	4.303				5.83725	2.76962	5.8716
	5.8413	4.29922				5.84085	2.75176	5.83372
	5.8449	4.29578				5.84445	2.73406	5.7962
	5.8485	4.29252				5.84805	2.7167	5.7594
	5.8521	4.28958				5.85165	2.69987	5.72372
	5.8557	4.28708				5.85525	2.68352	5.68906
	5.8593	4.28492				5.85885	2.66752	5.65514
	5.8629	4.28308				5.86245	2.65185	5.62193
	5.8665	4.28144				5.86605	2.63651	5.5894
	5.8701	4.27978				5.86965	2.62134	5.55723
	5.8737	4.27808				5.87325	2.60631	5.52537
	5.8773	4.27652				5.87685	2.59156	5.4941
	5.8809	4.27527				5.88045	2.57715	5.46356
	5.8845	4.27444				5.88405	2.56297	5.4335
	5.8881	4.27405				5.88765	2.54894	5.40375
	5.8917	4.27394				5.89125	2.53514	5.37449
	5.8953	4.27384				5.89485	2.52168	5.34597
	5.8989	4.27327				5.89845	2.50853	5.31809
	5.9025	4.27201				5.90205	2.49567	5.29082
	5.9061	4.2705				5.90565	2.4832	5.26439
	5.9097	4.26944				5.90925	2.47113	5.2388
	5.9133	4.26926				5.91285	2.45934	5.2138
	5.9169	4.27038				5.91645	2.44781	5.18935
	5.9205	4.27302				5.92005	2.43654	5.16547
	5.9241	4.27655				5.92365	2.42549	5.14205
	5.9277	4.2802				5.92725	2.41448	5.11869
	5.9313	4.28354				5.93085	2.40346	5.09533
	5.9349	4.28641				5.93445	2.39245	5.072
	5.9385	4.28911				5.93805	2.38147	5.04872
	5.9421	4.29241				5.94165	2.37045	5.02535
	5.9457	4.29676				5.94525	2.35945	5.00203
	5.9493	4.30194				5.94885	2.34856	4.97894
	5.9529	4.30757				5.95245	2.33779	4.95612
	5.9565	4.31318				5.95605	2.32713	4.93352
	5.9601	4.31858				5.95965	2.3167	4.91141
	5.9637	4.32366				5.96325	2.3066	4.88999
	5.9673	4.32857				5.96685	2.29672	4.86906
	5.9709	4.33377				5.97045	2.287	4.84844
	5.9745	4.33959				5.97405	2.27752	4.82833
	5.9781	4.34572				5.97765	2.26834	4.80888
	5.9817	4.35177				5.98125	2.25938	4.78989
	5.9853	4.35788				5.98485	2.25051	4.77109
	5.9889	4.36417				5.98845	2.24165	4.7523
	5.99251	4.37056				5.99206	2.23276	4.73346
	5.99611	4.37712				5.99566	2.2238	4.71446
	5.99971	4.38417				5.99926	2.21479	4.69535
	6.00331	4.39199				6.00286	2.2059	4.67651
	6.00691	4.40033				6.00646	2.19728	4.65823
	6.01051	4.40864				6.01006	2.18886	4.64039
	6.01411	4.41646				6.01366	2.1805	4.62266
	6.01771	4.42363				6.01726	2.17214	4.60493
	6.02131	4.43001				6.02086	2.16381	4.58727
	6.02491	4.43551				6.02446	2.15556	4.56978
	6.02851	4.44036				6.02806	2.14749	4.55269
	6.03211	4.4449				6.03166	2.13969	4.53615
	6.03571	4.44915				6.03526	2.13211	4.52008
	6.03931	4.45293				6.03886	2.12461	4.50417
	6.04291	4.45636				6.04246	2.1171	4.48825
	6.04651	4.45982				6.04606	2.10955	4.47225
	6.05011	4.46368				6.04966	2.10192	4.45607
	6.05371	4.46827				6.05326	2.09421	4.43973
	6.05731	4.47341				6.05686	2.08654	4.42347
	6.06091	4.47863				6.06046	2.07894	4.40735
	6.06451	4.48389				6.06406	2.07135	4.39126
	6.06811	4.48926				6.06766	2.06375	4.37515
	6.07171	4.49463				6.07126	2.05615	4.35904
	6.07531	4.49991				6.07486	2.04857	4.34296
	6.07891	4.50509				6.07846	2.041	4.32693
	6.08251	4.50996				6.08206	2.0335	4.31102
	6.08611	4.51437				6.08566	2.02614	4.29541
	6.08971	4.51824				6.08926	2.01892	4.28011
	6.09331	4.52161				6.09286	2.01183	4.26507
	6.09691	4.52467				6.09646	2.00491	4.25042
	6.10051	4.52775				6.10006	1.99827	4.23633
	6.10411	4.53084				6.10366	1.99186	4.22275
	6.10771	4.53369				6.10726	1.98564	4.20956
	6.11131	4.53637				6.11086	1.97962	4.19679
	6.11491	4.53936				6.11446	1.97373	4.18431
	6.11851	4.54263				6.11806	1.96784	4.17182
	6.12211	4.54591				6.12166	1.96183	4.15909
	6.12571	4.54907				6.12526	1.95576	4.1462
	6.12931	4.55203				6.12886	1.94961	4.13318
	6.13291	4.55455				6.13246	1.94337	4.11994
	6.13651	4.5563				6.13606	1.93703	4.1065
	6.14011	4.55699				6.13966	1.93067	4.09302
	6.14371	4.55682				6.14326	1.92431	4.07954
	6.14731	4.5562				6.14686	1.91791	4.06596
	6.15091	4.55528				6.15046	1.91144	4.05225
	6.15451	4.55433				6.15406	1.90494	4.03848
	6.15811	4.55378				6.15766	1.89852	4.02486
	6.16171	4.55371				6.16126	1.89224	4.01156
	6.16531	4.55378				6.16486	1.88616	3.99866
	6.16891	4.55376				6.16846	1.88026	3.98615
	6.17251	4.55346				6.17206	1.87448	3.9739
	6.17611	4.55293				6.17566	1.86868	3.9616
	6.17971	4.55237				6.17926	1.86273	3.94898
	6.18331	4.55188				6.18286	1.85658	3.93595
	6.18691	4.55138				6.18646	1.85032	3.92269
	6.19051	4.55073				6.19006	1.84412	3.90954
	6.19411	4.5499				6.19366	1.83806	3.89669
	6.19771	4.54905				6.19726	1.83211	3.88406
	6.20131	4.54837				6.20086	1.82618	3.87151
	6.20491	4.54796				6.20446	1.82031	3.85906
	6.20851	4.54798				6.20806	1.81452	3.84679
	6.21211	4.5484				6.21166	1.80882	3.83471
	6.21571	4.54861				6.21526	1.80328	3.82295
	6.21931	4.54806				6.21886	1.79799	3.81173
	6.22291	4.54654				6.22246	1.79292	3.801
	6.22651	4.54428				6.22606	1.78787	3.79029
	6.23011	4.54154				6.22966	1.78265	3.77921
	6.23371	4.5385				6.23326	1.77717	3.7676
	6.23731	4.53524				6.23686	1.77149	3.75557
	6.24091	4.53173				6.24046	1.7657	3.74328
	6.24451	4.52802				6.24406	1.75981	3.7308
	6.24811	4.524				6.24766	1.75387	3.71821
	6.25171	4.51978				6.25126	1.74796	3.70568
	6.25531	4.51588				6.25486	1.74205	3.69314
	6.25891	4.51287				6.25846	1.73608	3.68049
	6.26251	4.51052				6.26206	1.73012	3.66785
	6.26611	4.50813				6.26566	1.72428	3.65547
	6.26971	4.50535				6.26926	1.71859	3.64341
	6.27331	4.50184				6.27286	1.71302	3.6316
	6.27691	4.49744				6.27646	1.70753	3.61997
	6.28051	4.49251				6.28006	1.70213	3.60852
	6.28411	4.48791				6.28366	1.69683	3.59727
	6.28771	4.48405				6.28726	1.6916	3.58619
	6.29131	4.48067				6.29086	1.68647	3.57532
	6.29491	4.47722				6.29446	1.68147	3.56472
	6.29851	4.47311				6.29806	1.67656	3.55431
	6.30211	4.46816				6.30166	1.67171	3.54403
	6.30571	4.46224				6.30526	1.66694	3.53392
	6.30931	4.45553				6.30886	1.66226	3.52399
	6.31291	4.44838				6.31246	1.65764	3.5142
	6.31651	4.44086				6.31606	1.65304	3.50444
	6.32011	4.43259				6.31966	1.64837	3.49455
	6.32371	4.4236				6.32326	1.64353	3.48429
	6.32731	4.41415				6.32686	1.63845	3.47351
	6.33091	4.40432				6.33046	1.63312	3.46221
	6.33451	4.39439				6.33406	1.62763	3.45058
	6.33811	4.38503				6.33766	1.62209	3.43883
	6.34171	4.37631				6.34126	1.61654	3.42707
	6.34531	4.36791				6.34486	1.61101	3.41533
	6.34891	4.35971				6.34846	1.60544	3.40353
	6.35251	4.35172				6.35206	1.59977	3.39151
	6.35611	4.34362				6.35566	1.59398	3.37925
	6.35971	4.3352				6.35926	1.58818	3.36695
	6.36331	4.32655				6.36286	1.58247	3.35483
	6.36691	4.31782				6.36646	1.57691	3.34306
	6.37051	4.30887				6.37006	1.57155	3.33168
	6.37411	4.29943				6.37366	1.56623	3.32041
	6.37771	4.28932				6.37726	1.56076	3.3088
	6.38131	4.2787				6.38086	1.55505	3.29671
	6.38491	4.26754				6.38446	1.54921	3.28433
	6.38851	4.2558				6.38806	1.54334	3.27187
	6.39211	4.24381				6.39166	1.53747	3.25944
	6.39571	4.23212				6.39526	1.53165	3.2471
	6.39931	4.22086				6.39886	1.52585	3.23481
	6.40291	4.20979				6.40246	1.51999	3.22237
	6.40651	4.19898				6.40606	1.51393	3.20952
	6.41011	4.18835				6.40966	1.50774	3.1964
	6.41371	4.17743				6.41326	1.50158	3.18334
	6.41731	4.16558				6.41686	1.49553	3.17052
	6.42091	4.15289				6.42046	1.48954	3.15783
	6.42451	4.13987				6.42406	1.48359	3.1452
	6.42811	4.12672				6.42766	1.47767	3.13267
	6.43171	4.11318				6.43126	1.47182	3.12027
	6.43531	4.09899				6.43486	1.46604	3.10801
	6.43891	4.08424				6.43846	1.46035	3.09594
	6.44251	4.06891				6.44206	1.4548	3.08417
	6.44611	4.0528				6.44566	1.44931	3.07253
	6.44971	4.03607				6.44926	1.44378	3.06082
	6.45331	4.01972				6.45286	1.43825	3.04909
	6.45691	4.00451				6.45646	1.43276	3.03744
	6.46051	3.98996				6.46006	1.42729	3.02586
	6.46411	3.97541				6.46366	1.42189	3.0144
	6.46771	3.96092				6.46726	1.41652	3.00303
	6.47131	3.94662				6.47086	1.41105	2.99144
	6.47491	3.93208				6.47446	1.40532	2.97928
	6.47851	3.91708				6.47806	1.39928	2.96646
	6.48211	3.90184				6.48166	1.39297	2.9531
	6.48571	3.88662				6.48526	1.38653	2.93944
	6.48931	3.87124				6.48886	1.38001	2.92561
	6.49291	3.85531				6.49246	1.37344	2.9117
	6.49651	3.83897				6.49606	1.36693	2.8979
	6.50011	3.82292				6.49966	1.36051	2.88428
	6.50371	3.80743				6.50326	1.35409	2.87066
	6.50731	3.79208				6.50686	1.34765	2.85702
	6.51091	3.77681				6.51046	1.34131	2.84358
	6.51451	3.76186				6.51406	1.33513	2.83047
	6.51811	3.74721				6.51766	1.32905	2.81759
	6.52171	3.73256				6.52126	1.32308	2.80493
	6.52531	3.71809				6.52486	1.31731	2.79269
	6.52891	3.70411				6.52846	1.31172	2.78084
	6.53251	3.69039				6.53206	1.30615	2.76904
	6.53611	3.67627				6.53566	1.30048	2.75702
	6.53971	3.66153				6.53926	1.29473	2.74483
	6.54331	3.64666				6.54286	1.28892	2.7325
	6.54691	3.63197				6.54646	1.28302	2.72
	6.55051	3.61735				6.55006	1.27709	2.70743
	6.55411	3.60288				6.55366	1.27123	2.695
	6.55771	3.58897				6.55726	1.26543	2.68272
	6.56131	3.57548				6.56086	1.25959	2.67032
	6.56491	3.56165				6.56446	1.25358	2.65759
	6.56851	3.54723				6.56806	1.24745	2.6446
	6.57211	3.53278				6.57166	1.24128	2.63152
	6.57571	3.51869				6.57526	1.23504	2.61829
	6.57931	3.50449				6.57886	1.22873	2.60492
	6.58291	3.48991				6.58246	1.22245	2.59159
	6.58651	3.47528				6.58606	1.21626	2.57846
	6.59011	3.46052				6.58966	1.21014	2.56551
	6.59371	3.44487				6.59326	1.20411	2.55271
	6.59731	3.4283				6.59686	1.19816	2.54011
	6.60091	3.41168				6.60046	1.1923	2.52767
	6.60451	3.39572				6.60406	1.18648	2.51533
	6.60811	3.38032				6.60766	1.18069	2.50307
	6.61171	3.36527				6.61126	1.17497	2.49093
	6.61531	3.35072				6.61486	1.16933	2.47899
	6.61891	3.33664				6.61846	1.16381	2.46728
	6.62251	3.32282				6.62206	1.15842	2.45585
	6.62611	3.30928				6.62566	1.15312	2.44461
	6.62971	3.29644				6.62926	1.14784	2.43342
	6.63331	3.28441				6.63286	1.14254	2.42218
	6.63691	3.27267				6.63646	1.13724	2.41095
	6.64051	3.26073				6.64006	1.13195	2.39974
	6.64411	3.24854				6.64366	1.12668	2.38856
	6.64771	3.23634				6.64726	1.12147	2.37751
	6.65131	3.2241				6.65086	1.11637	2.36669
	6.65491	3.21183				6.65446	1.11138	2.35612
	6.65851	3.19926				6.65806	1.10649	2.34577
	6.66211	3.18594				6.66166	1.10169	2.33557
	6.66571	3.17173				6.66526	1.09693	2.3255
	6.66931	3.15703				6.66886	1.09221	2.31548
	6.67291	3.14225				6.67246	1.08746	2.30542
	6.67651	3.1275				6.67606	1.08269	2.2953
	6.68011	3.11286				6.67966	1.07788	2.28511
	6.68371	3.09801				6.68326	1.07303	2.27483
	6.68731	3.08245				6.68686	1.06814	2.26445
	6.69091	3.06599				6.69046	1.06324	2.25407
	6.69451	3.0491				6.69406	1.05834	2.24369
	6.69811	3.03245				6.69766	1.05344	2.2333
	6.70171	3.01636				6.70126	1.04859	2.22302
	6.70531	3.00076				6.70486	1.04388	2.21304
	6.70891	2.98564				6.70846	1.03933	2.20339
	6.71251	2.97119				6.71206	1.03488	2.19395
	6.71611	2.9575				6.71566	1.03051	2.18468
	6.71971	2.94466				6.71926	1.02626	2.17566
	6.72331	2.93269				6.72286	1.02212	2.16689
	6.72691	2.92139				6.72646	1.01807	2.1583
	6.73051	2.91026				6.73006	1.01411	2.14991
	6.73411	2.89896				6.73366	1.01025	2.14173
	6.73771	2.88756				6.73726	1.00646	2.1337
	6.74131	2.87619				6.74086	1.0027	2.12573
	6.74491	2.86491				6.74446	0.998987	2.11785
	6.74851	2.85357				6.74806	0.995388	2.11022
	6.75211	2.84206				6.75166	0.991972	2.10298
	6.75571	2.8302				6.75526	0.988718	2.09608
	6.75931	2.81803				6.75886	0.985578	2.08943
	6.76291	2.80598				6.76246	0.982529	2.08296
	6.76651	2.79462				6.76606	0.979512	2.07657
	6.77011	2.78421				6.76966	0.976459	2.07009
	6.77371	2.77461				6.77326	0.973356	2.06351
	6.77731	2.76551				6.77686	0.97022	2.05687
	6.78091	2.75669				6.78046	0.967061	2.05017
	6.78451	2.74831				6.78406	0.963926	2.04352
	6.78811	2.74044				6.78766	0.960864	2.03703
	6.79171	2.73305				6.79126	0.957909	2.03077
	6.79531	2.72644				6.79486	0.955052	2.02471
	6.79891	2.72088				6.79846	0.95224	2.01875
	6.80251	2.71604				6.80206	0.949403	2.01273
	6.80611	2.7114				6.80566	0.946561	2.00671
	6.80971	2.70699				6.80926	0.943749	2.00075
	6.81331	2.70307				6.81286	0.941005	1.99493
	6.81691	2.6998				6.81646	0.938378	1.98936
	6.82051	2.69721				6.82006	0.935901	1.98411
	6.82411	2.69537				6.82366	0.933493	1.97901
	6.82771	2.69432				6.82726	0.931077	1.97388
	6.83131	2.69394				6.83086	0.928663	1.96877
	6.83491	2.69374				6.83446	0.926316	1.96379
	6.83851	2.69355				6.83806	0.924115	1.95912
	6.84211	2.69392				6.84166	0.922131	1.95492
	6.84571	2.69522				6.84526	0.920397	1.95124
	6.84931	2.69733				6.84886	0.918913	1.9481
	6.85291	2.70024				6.85246	0.917628	1.94537
	6.85651	2.70426				6.85606	0.91641	1.94279
	6.86011	2.70936				6.85966	0.915199	1.94022
	6.86371	2.71558				6.86326	0.914003	1.93769
	6.86731	2.72317				6.86686	0.912821	1.93518
	6.87091	2.73243				6.87046	0.911621	1.93264
	6.87451	2.74345				6.87406	0.910405	1.93006
	6.87811	2.75629				6.87766	0.909187	1.92748
	6.88171	2.77094				6.88126	0.907953	1.92486
	6.88531	2.78757				6.88486	0.90668	1.92216
	6.88891	2.80629				6.88846	0.905349	1.91934
	6.89251	2.82682				6.89206	0.904011	1.9165
	6.89611	2.84853				6.89566	0.902749	1.91383
	6.89971	2.87108				6.89926	0.901645	1.91149
	6.90331	2.89416				6.90286	0.900729	1.90955
	6.90691	2.91781				6.90646	0.900037	1.90808
	6.91051	2.94258				6.91006	0.8996	1.90715
	6.91411	2.96914				6.91366	0.899395	1.90672
	6.91771	2.9977				6.91726	0.899346	1.90661
	6.92131	3.0282				6.92086	0.899389	1.9067
	6.92491	3.06035				6.92446	0.899518	1.90698
	6.92851	3.09384				6.92806	0.899734	1.90744
	6.93211	3.12879				6.93166	0.900023	1.90805
	6.93571	3.16581				6.93526	0.90034	1.90872
	6.93931	3.20533				6.93886	0.900696	1.90948
	6.94291	3.24759				6.94246	0.901116	1.91037
	6.94651	3.29248				6.94606	0.901569	1.91133
	6.95011	3.33955				6.94966	0.902006	1.91225
	6.95371	3.388				6.95326	0.902458	1.91321
	6.95731	3.43713				6.95686	0.902994	1.91435
	6.96091	3.48677				6.96046	0.90367	1.91578
	6.96451	3.53733				6.96406	0.90452	1.91758
	6.96811	3.5892				6.96766	0.905542	1.91975
	6.97171	3.64231				6.97126	0.906717	1.92224
	6.97531	3.6965				6.97486	0.908019	1.925
	6.97891	3.75189				6.97846	0.909404	1.92794
	6.98251	3.80858				6.98206	0.910856	1.93101
	6.98611	3.86656				6.98566	0.912379	1.93424
	6.98971	3.92603				6.98926	0.913971	1.93762
	6.99331	3.98756				6.99286	0.915586	1.94104
	6.99691	4.05148				6.99646	0.917188	1.94444
	7.00051	4.11743				7.00006	0.918753	1.94776
	7.00411	4.18478				7.00366	0.920313	1.95106
	7.00771	4.25336				7.00726	0.921941	1.95451
	7.01131	4.32323				7.01086	0.923691	1.95822
	7.01491	4.39418				7.01446	0.925559	1.96219
	7.01851	4.46575				7.01806	0.927524	1.96635
	7.02211	4.53776				7.02166	0.929579	1.97071
	7.02571	4.61031				7.02526	0.931735	1.97528
	7.02931	4.68375				7.02886	0.934022	1.98013
	7.03291	4.75804				7.03246	0.936464	1.9853
	7.03651	4.83319				7.03606	0.939037	1.99076
	7.04011	4.90937				7.03966	0.941665	1.99633
	7.04371	4.98656				7.04326	0.94428	2.00187
	7.04731	5.06405				7.04686	0.946874	2.00737
	7.05091	5.14161				7.05046	0.949459	2.01285
	7.05451	5.21964				7.05406	0.952049	2.01834
	7.05811	5.29849				7.05766	0.954664	2.02389
	7.06171	5.37776				7.06126	0.957324	2.02953
	7.06531	5.45701				7.06486	0.960034	2.03527
	7.06891	5.536				7.06846	0.962782	2.0411
	7.07251	5.61473				7.07206	0.965587	2.04704
	7.07611	5.69307				7.07566	0.968481	2.05318
	7.07971	5.77117				7.07926	0.971475	2.05953
	7.08331	5.84948				7.08286	0.974511	2.06596
	7.08691	5.92803				7.08646	0.977533	2.07237
	7.09051	6.00602				7.09006	0.980537	2.07874
	7.09411	6.08287				7.09366	0.983533	2.08509
	7.09771	6.15882				7.09726	0.98649	2.09136
	7.10131	6.23403				7.10086	0.98939	2.09751
	7.10491	6.30818				7.10446	0.99221	2.10349
	7.10851	6.3812				7.10806	0.994921	2.10923
	7.11211	6.45335				7.11166	0.997541	2.11479
	7.11571	6.52463				7.11526	1.00015	2.12032
	7.11931	6.59461				7.11886	1.00282	2.12597
	7.12291	6.66343				7.12246	1.00552	2.13171
	7.12651	6.73157				7.12606	1.00822	2.13743
	7.13011	6.79882				7.12966	1.01086	2.14302
	7.13371	6.86421				7.13326	1.01342	2.14845
	7.13731	6.92723				7.13686	1.01591	2.15374
	7.14091	6.98791				7.14046	1.0184	2.15901
	7.14451	7.04621				7.14406	1.02095	2.16441
	7.14811	7.10225				7.14766	1.02355	2.16993
	7.15171	7.15619				7.15126	1.02612	2.17537
	7.15531	7.20791				7.15486	1.02855	2.18052
	7.15891	7.2573				7.15846	1.03086	2.18542
	7.16251	7.30436				7.16206	1.03315	2.19028
	7.16611	7.34923				7.16566	1.03555	2.19536
	7.16971	7.39218				7.16926	1.0381	2.20078
	7.17331	7.43339				7.17286	1.0408	2.2065
	7.17691	7.47257				7.17646	1.04355	2.21233
	7.18051	7.50933				7.18006	1.04622	2.21799
	7.18411	7.54314				7.18366	1.0487	2.22325
	7.18771	7.57379				7.18726	1.05098	2.22808
	7.19131	7.60156				7.19086	1.05319	2.23277
	7.19491	7.62688				7.19446	1.05541	2.23748
	7.19851	7.64965				7.19806	1.05765	2.24222
[truncated: 3,555 more rows]
