# Supplementary material for: Structural basis for ion selectivity in TMEM175 K+ channels
Source: eLife. 2020 Apr 8;9:e53683. doi: 10.7554/eLife.53683 (PMC7176437; doi:10.7554/eLife.53683)
Supplement: Figure 2—source data 1. [file elife-53683-fig2-data1.xlsx]

## Sheet: Blatt1
Fig. 2a
TMEM175 I/pA	-161	-1660	-203	-379	-559	-2144	-255	-1012	-553	-1466	-749	-924
mock I/pA	-5	-44	-21	-22	-11	-5	-18	-7	-23	-7	-34	-17
TMEM175 I/pA	-624	-587	-587	-995	-143	-149
mock I/pA	-24	-9.5
	mean	SD
	-730.556	544.614
	-17.6786	11.0802
