# Supplementary material for: Structural basis for ion selectivity in TMEM175 K+ channels
Source: eLife. 2020 Apr 8;9:e53683. doi: 10.7554/eLife.53683 (PMC7176437; doi:10.7554/eLife.53683)
Supplement: Figure 2—source data 2. [file elife-53683-fig2-data2.xlsx]

## Sheet: Blatt1
Fig.2b
		cell 1			Cell 2			cell 3			cell 4			control		plus Zn
	voltage	I/nA control	plus Zn		I/nA control	plus Zn		I/nA control	plus Zn		I/nA control	plus Zn		mean	SD	mean	SD
	100	1.9	0.341		3.4	0.27		0.357	0.142		0.39	0.139		1.51175	1.25579	0.223	0.0862409
	80	1.46	0.245		2.7	0.199		0.234	0.102		0.265	0.107		1.16475	1.01489	0.16325	0.0609851
	60	1.04	0.189		1.95	0.14		0.146	0.075		0.168	0.076		0.826	0.742384	0.12	0.0477546
	40	0.67	0.126		1.1	0.089		0.093	0.048		0.097	0.05		0.49	0.423249	0.07825	0.0320498
	20	0.33	0.07		0.4	0.045		0.048	0.025		0.039	0.025		0.20425	0.162675	0.04125	0.0184983
	0	0.032	0.02		-0.32	0.009		0.005	0.0099		-0.0068	0.008		-0.07245	0.143613	0.011725	0.00482461
	-20	-0.264	-0.03		-1	-0.027		-0.039	-0.006		-0.05	-0.015		-0.33825	0.392449	-0.0195	0.00960469
	-40	-0.554	-0.0812		-1.86	-0.063		-0.078	-0.04		-0.091	-0.034		-0.64575	0.726792	-0.05455	0.0188124
	-60	-0.848	-0.126		-2.68	-0.087		-0.125	-0.065		-0.143	-0.053		-0.949	1.04105	-0.08275	0.0277883
	-80	-1.138	-0.173		-3.43	-0.109		-0.164	-0.082		-0.198	-0.076		-1.2325	1.32757	-0.11	0.0384383
	-100	-1.445	-0.216		-4.4	-0.138		-0.203	-0.111		-0.244	-0.095		-1.573	1.70671	-0.14	0.0464919
