# Supplementary material for: Structural basis for ion selectivity in TMEM175 K+ channels
Source: eLife. 2020 Apr 8;9:e53683. doi: 10.7554/eLife.53683 (PMC7176437; doi:10.7554/eLife.53683)
Supplement: Figure 2—source data 3. [file elife-53683-fig2-data3.xlsx]

## Sheet: Blatt1
Fig.2c
	K	Cs	Rb	Na	Li
	mean	mean	mean	mean	mean
	0.555556	-2.16667	3.71429	-37.35	-39.2333
	SD	SD	SD	SD	SD
	3.41926	3.02306	4.4949	5.76327	4.56606
	Rev.Volt/mV	Rev.Volt/mV	Rev.Volt/mV	Rev.Volt/mV	Rev.Volt/mV
	K+	Cs+	Rb+	Na+	Li+
	0	-3	-4	-36	-38.2
	2	-2	4	-36.6	-34.1
	1	0	-2	-35.5	-39.5
	0	-5	6	-43.4	-40.2
	0	-6	7	-44.9	-48.2
	-5	3	6	-35.8	-35.2
	4		9	-37
	2			-48
	-2			-45.2
	-6			-33
	8			-32
	7			-34
	0			-30.4
	0			-31
	0			-37
	2			-38.2
	-3			-38
	0			-37
				-38.1
				-36
				-49.6
				-25
