# Supplementary material for: Structural basis for ion selectivity in TMEM175 K+ channels
Source: eLife. 2020 Apr 8;9:e53683. doi: 10.7554/eLife.53683 (PMC7176437; doi:10.7554/eLife.53683)
Supplement: Figure 2—source data 4. [file elife-53683-fig2-data4.xlsx]

## Sheet: Blatt1
Fig. 2d
single channel
voltage	current/pA	current/pA	current/pA	current/pA
-125	-10.09	-8.8	-10	-11
-100	-6.5	-7	-7.1	-7
-75	-4.8	-4.6	-4.8	-4.8
-50	-2.6	-3	-3	-3
-25
0
25
50	3.9
75	7	7.2	7.2	7
95	8.3		8.3
100	8.4	8.1	8.15	8.2
