# Supplementary material for: Structural basis for ion selectivity in TMEM175 K+ channels
Source: eLife. 2020 Apr 8;9:e53683. doi: 10.7554/eLife.53683 (PMC7176437; doi:10.7554/eLife.53683)
Supplement: Figure 5—source data 1. [file elife-53683-fig5-data1.xlsx]

## Sheet: Blatt1
Fig. 5b
	wt			T38A			L35A
	K+	Na+		K+	Na+		K+	Na+
	-1.4	-36		1.4	-17		-0.9884	-33.1212
	1.9	-36.6		-3.3	-15.6		0.487	-30.292
	3.9	-35.5		1.2	-13.2		-1.1714	-27.876
	2.7	-43.4		-2.9	-13.3		0.0694	-28.672
	0.4	-44.9		0.4				-31.252
	3.4	-35.8		-1.2				-34.548
	0.8	-37
	0.8	-48
	0.6	-45
	1.3	-33
		-32
		-34
		-30
		-31
		-37
		-38
		-38
		-37
		-38
		-36
		-49
		-25
mean volt/mV	1.44	-37.2818		-0.733333	-14.775		-0.40085	-30.9602
sd	1.49613	5.7147		1.87409	1.60371		0.697921	2.33887
