# Supplementary material for: Structural basis for ion selectivity in TMEM175 K+ channels
Source: eLife. 2020 Apr 8;9:e53683. doi: 10.7554/eLife.53683 (PMC7176437; doi:10.7554/eLife.53683)
Supplement: Figure 5—source data 2. [file elife-53683-fig5-data2.xlsx]

## Sheet: Blatt1
	wt			S45A			T49A/T274A			S45A/T49A/T274A
Fig. 5d	K+	Na+		K+	Na+		K+	Na+		K+	Na+
	-0.2	-54.8		-1.3	-27.2		-2	-20.5		2.5	-21.01
	-2.24	-61		-1.5	-27.6		-3.8	-13.9		1.56	-17.35
	-1.3	-62.1		0.5	-27.4		-1.7	-13.4		-0.3	-19.8
	2	-57.3		1.5	-29.1		1.36	-17.2		0.4	-29.1
	-2	-61.9		-2.3	-27.9		0.2	-18.83		-0.1	-25.22
	3.2	-55.2		0.6	-27.6		0.93	-27.2		1.9	-23.57
	-4	-55.8		-7.5	-30.9		2.6	-17.3		1.5	-22.09
	1.8			-4	-28.8		2.85	-17.6		0.2	-20.83
	1			-3.25	-27.7		-1.7
	3.6			-2.55	-28.5
	-0.15			2.3	-25.3
	2			-1.2	-26.6
				-5	-24.3
				0.5	-25.8
				0.8	-25.6
				-1.2	-23.1
				-2.3	-22.2
				0.5	-22.6
				-0.5	-31.7
				0.7	-27.3
				0.1	-28.7
					-29.4
					-25.1
					-23.6
mean	0.309167	-58.3		-1.19524	-26.8333		-0.14	-18.2413		0.9575	-22.3712
SD	2.25579	3.01899		2.30687	2.4496		2.15202	4.03691		0.968836	3.37195
