# Supplementary material for: Structural basis for ion selectivity in TMEM175 K+ channels
Source: eLife. 2020 Apr 8;9:e53683. doi: 10.7554/eLife.53683 (PMC7176437; doi:10.7554/eLife.53683)
Supplement: Figure 6—figure supplement 1—source data 1. [file elife-53683-fig6-figsupp1-data1.xlsx]

## Sheet: Blatt1
Fig. 6–figure supplement 1a		wt	T38A
		rel block ±Zn
		0.84	0.84
		0.61	0.63
		0.56	0.63
		0.65	0.69
	mean	0.665	0.6975
	SD	0.122338	0.0991211
