# Supplementary material for: Structural basis for ion selectivity in TMEM175 K+ channels
Source: eLife. 2020 Apr 8;9:e53683. doi: 10.7554/eLife.53683 (PMC7176437; doi:10.7554/eLife.53683)
Supplement: Figure 6—source data 1. [file elife-53683-fig6-data1.xlsx]

## Sheet: Blatt1
Fig. 6a		wt	S45A
		rel. Block ±Zn
		0.596798	0.172779
		0.538953	0.0358821
		0.567296	0.0773372
			0.114202
	mean	0.567683	0.10005
	SD	0.0236167	0.0503071
