# Supplementary material for: Structural basis for ion selectivity in TMEM175 K+ channels
Source: eLife. 2020 Apr 8;9:e53683. doi: 10.7554/eLife.53683 (PMC7176437; doi:10.7554/eLife.53683)
Supplement: Figure 6—source data 2. [file elife-53683-fig6-data2.xlsx]

## Sheet: Blatt1
		rel. Block±4-AP
		wt	S45A
Fig. 6b		0.68219	0.123207
		0.663616	0.0341984
		0.66267	0.067075
		0.672006	0.00666477
	mean	0.67012	0.0577862
	SD	0.00785867	0.0434047
